# Supplementary material
Source: ML conference proceedings conference paper supplement (https://openreview.net/forum?id=rKNOWYRaXaJ)
Supplement: supplementary_material [file attachment]

## A Conditioning

We analyze the condition number of underdamped Langevin dynamics with potential  $f(x) = \frac{1}{2} \|x\|^2$  and stationary distribution  $p(x, v) = e^{-f(x) - \frac{1}{2} \|v\|^2} = e^{-\frac{1}{2} (\|x\|^2 + \|v\|^2)}$ . Underdamped Langevin dynamics is given by the following SDE's,

$$dx_t = -v_t \tag{18}$$

$$\begin{aligned} dv_t &= -\gamma v_t - \nabla f(x_t) + \sqrt{2} dB_t \\ &= -\gamma v_t - x_t + \sqrt{2} dB_t. \end{aligned} \tag{19}$$

Given the distribution  $p_0$  at time 0, the distribution  $p_t$  at time  $t$  is the same as that given by,

$$\begin{bmatrix} \frac{dx}{dt} \\ \frac{dv}{dt} \end{bmatrix} = - \begin{bmatrix} 0 & -I_d \\ I_d & \gamma I_d \end{bmatrix} \begin{bmatrix} \nabla_x \frac{\delta \text{KL}(p_t \| p^*)}{\delta p_t} \\ \nabla_v \frac{\delta \text{KL}(p_t \| p^*)}{\delta p_t} \end{bmatrix} \tag{20}$$

which simplifies to

$$d \begin{bmatrix} x_t \\ v_t \end{bmatrix} = \begin{bmatrix} O & I_d \\ -I_d & -\gamma I_d \end{bmatrix} (\nabla \ln p_t - \nabla \ln p). \tag{21}$$

Our goal is to prove the following theorem.

**Theorem 6.** *Consider underdamped Langevin dynamics (18)–(19) with friction coefficient  $\gamma < 2$  and starting distribution  $p_0$  that is  $C^2$ . Let  $T_t$  denote the transport map from time 0 to time  $t$  induced by (21). Suppose that the initial distribution  $p_0(x, v)$  is such that*

$$I_{2d} \preceq -\nabla^2 \ln p_0(x, v) \preceq \kappa I_{2d}.$$

Then for any  $x_0, v_0$  and unit vector  $w$ , the directional derivative of  $T_t$  at  $x_0, v_0$  in direction  $w$  satisfies

$$\left(1 + \frac{2 + \gamma}{2 - \gamma} (\kappa - 1)\right)^{-2/\gamma} \leq \|D_w T_t(x_0)\| \leq \left(1 + \frac{2 + \gamma}{2 - \gamma} (\kappa - 1)\right)^{2/\gamma}$$

Thus the condition number of  $T_t$  is bounded by  $\left(1 + \frac{2 + \gamma}{2 - \gamma} (\kappa - 1)\right)^{4/\gamma}$ .

We remark that the exponent is likely loose by a factor of 2, and that taking  $\gamma \rightarrow 2$  gives the best exponent; however, the case  $\gamma = 2$  would require a separate calculation as the matrix appearing in the exponential is not diagonalizable. Note  $\gamma = 2$  is the transition between when the dynamics exhibit underdamped and overdamped behavior.

To prove the theorem, we first relate the Jacobian with the Hessian of the log-pdf. By Lemma 12, the Jacobian  $D_t = DT_t(x_0)$  satisfies

$$\frac{d}{dt} D_t = \begin{bmatrix} O & I_d \\ -I_d & -\gamma I_d \end{bmatrix} \nabla^2 (\ln p_t - \ln p) D_t. \tag{22}$$

We will show that  $\nabla^2 (\ln p_t - \ln p)$  decays exponentially (Lemma 8). First, we need the following bound for convolutions.

### A.1 Bounding the Hessian of the logarithm of a convolution

**Lemma 7.** *Suppose that  $p$  is a probability density function on  $\mathbb{R}^d$  such that  $\Sigma_1^{-1} \preceq -\nabla^2 \ln p \preceq \Sigma_2^{-1}$ . Let  $q$  be the distribution of  $N(0, \Sigma)$  (where  $\Sigma$  is not necessarily full-rank). Then*

$$(\Sigma_1 + \Sigma)^{-1} \preceq -\nabla^2 \ln(p * q) \preceq (\Sigma_2 + \Sigma)^{-1}.$$

*Proof.* The lower bound is a bound on the strong log-concavity parameter; see Theorem 3.7b in Saumard and Wellner [2014].

For the upper bound, we first prove the lemma in the case that  $\Sigma$  is full rank. We have  $(p * q)(x) = \int_{\mathbb{R}^d} p(u)q(x-u) du$ , so

$$\begin{aligned} \nabla^2[\ln((p * q)(x))] &= \frac{\int_{\mathbb{R}^d} p(u)\nabla^2 q(x-u) du}{\int_{\mathbb{R}^d} p(u)q(x-u) du} - \left( \frac{\int_{\mathbb{R}^d} p(u)\nabla q(x-u) du}{\int_{\mathbb{R}^d} p(u)q(x-u) du} \right) \left( \frac{\int_{\mathbb{R}^d} p(u)\nabla q(x-u) du}{\int_{\mathbb{R}^d} p(u)q(x-u) du} \right)^\top \\ &= \left( \frac{\int_{\mathbb{R}^d} \Sigma^{-1}(x-u)p(u)q(x-u) du}{\int_{\mathbb{R}^d} p(u)q(x-u) du} \right) \left( \frac{\int_{\mathbb{R}^d} (\Sigma^{-1}(x-u))^\top p(u)q(x-u) du}{\int_{\mathbb{R}^d} p(u)q(x-u) du} \right) \\ &\quad - \frac{\int_{\mathbb{R}^d} (\Sigma^{-1}(x-u)(x-u)^\top \Sigma^{-1} - \Sigma^{-1})p(u)q(x-u) du}{\int_{\mathbb{R}^d} p(u)q(x-u) du} \end{aligned}$$

Let  $\mu_x$  denote the distribution with density function  $\rho(u) \propto p(u)q(x-u)$ . Then

$$\begin{aligned} -\nabla^2[\ln((p * q)(x))] &= [\mathbb{E}_{\mu_x} \Sigma^{-1}(u-x)][\mathbb{E}_{\mu_x} (\Sigma^{-1}(u-x))^\top] - [\mathbb{E}_{\mu_x} \Sigma^{-1}(u-x)(u-x)^\top \Sigma^{-1}] + \Sigma^{-1} \\ &= -\mathbb{E}_{\mu_x} [\Sigma^{-1}(u - \mathbb{E}u)(u - \mathbb{E}u)^\top \Sigma^{-1}] + \Sigma^{-1}. \end{aligned}$$

It suffices to show for any unit vector  $v$ , that

$$-v^\top \nabla^2[\ln((p * q)(x))]v = -\mathbb{E}_{\mu_x} [\langle \Sigma^{-1}v, (u - \mathbb{E}u) \rangle^2] + v^\top \Sigma^{-1}v \leq v^\top (\Sigma_2 + \Sigma)^{-1}v$$

Note that  $\mu_x$  satisfies

$$-\nabla^2 \ln \mu_x \preceq \Sigma_2^{-1} + \Sigma^{-1},$$

so  $\mu_x$  can be written as the density of a Gaussian with variance  $(\Sigma_2^{-1} + \Sigma^{-1})^{-1}$  multiplied by a log-convex function. By the Brascamp-Lieb moment inequality (Theorem 5.1 in [Brascamp and Lieb \[2002\]](#))<sup>3</sup>,

$$\mathbb{E}_{\mu_x} [\langle \Sigma^{-1}v, (u - \mathbb{E}u) \rangle^2] \geq \mathbb{E}_{u \sim N(0, (\Sigma_2^{-1} + \Sigma^{-1})^{-1})} [\langle \Sigma^{-1}v, u \rangle^2] = v^\top \Sigma^{-1} (\Sigma_2^{-1} + \Sigma^{-1})^{-1} \Sigma^{-1} v.$$

Hence

$$-v^\top \nabla^2[\ln((p * q)(x))]v \leq v^\top [-\Sigma^{-1} (\Sigma_2^{-1} + \Sigma^{-1})^{-1} \Sigma^{-1} + \Sigma^{-1}] v$$

The conclusion then follows from

$$\begin{aligned} -\Sigma^{-1} (\Sigma_2^{-1} + \Sigma^{-1})^{-1} \Sigma^{-1} + \Sigma^{-1} &= -(\Sigma \Sigma_2^{-1} \Sigma + \Sigma)^{-1} + \Sigma^{-1} \\ &= (\Sigma \Sigma_2^{-1} \Sigma + \Sigma)^{-1} (\cancel{\mathcal{I}_d} + \Sigma \Sigma_2^{-1} + \cancel{\mathcal{I}_d}) \\ &= (\Sigma + \Sigma_2)^{-1}. \end{aligned}$$

Now for the general case, take the limit as  $\Sigma' \rightarrow \Sigma$  where  $\Sigma'$  is full-rank. More precisely, let  $\Sigma_t = \Sigma + tP$ , where  $P$  is projection onto  $\text{Im}(\Sigma)^\perp$ , and let  $q_t$  be the density function for  $N(0, \Sigma_t)$ . Then we have

$$\nabla^2[\ln((p * q_t)(x))] = \frac{\int_{\mathbb{R}^d} \nabla^2 p(x-u)q_t(u) du}{\int_{\mathbb{R}^d} p(x-u)q_t(u) du} - \left( \frac{\int_{\mathbb{R}^d} \nabla p(x-u)q_t(u) du}{\int_{\mathbb{R}^d} p(x-u)q_t(u) du} \right) \left( \frac{\int_{\mathbb{R}^d} \nabla p(x-u)q_t(u) du}{\int_{\mathbb{R}^d} p(x-u)q_t(u) du} \right)^\top$$

Examining the first term, we have

$$\begin{aligned} \int_{\mathbb{R}^d} \nabla^2 p(x-u)q_t(u) du &= \int_{\text{Im}(\Sigma)} \int_{\text{Im}(P)} \nabla^2 p(x-u-v)q_t(u+v) dv du \\ &\rightarrow \int_{\text{Im}(\Sigma)} \nabla^2 p(x-u)q_t(u) du \text{ as } t \rightarrow 0^+ \end{aligned}$$

by the dominated convergence theorem. Similarly, the other integrals converge to their counterparts with  $q(u)$ . Therefore,  $\nabla^2[\ln((p * q_t)(x))] \rightarrow \nabla^2[\ln((p * q)(x))]$  as  $t \rightarrow 0^+$ . Apply the lemma to the full-rank case; the RHS bound converges to the desired bound:  $(\Sigma_2 + \Sigma_t)^{-1} \rightarrow (\Sigma_2 + \Sigma)^{-1}$ .

□

<sup>3</sup>Note that the sign is flipped in the theorem statement in the log-convex case.

## A.2 Bounding the variance proxy for underdamped Langevin

As it is useful to work with the matrices  $\Sigma_1$  and  $\Sigma_2$ , we make the following definition.

**Definition 10.** Let  $p$  be a probability density on  $\mathbb{R}^d$ . For a positive definite matrix  $\Sigma_1$ , if  $\Sigma_1^{-1} \succeq -\nabla^2 \ln p$ , we say that  $\Sigma_1$  is an **upper variance proxy** for  $p$ . For a positive definite matrix  $\Sigma_2$ , if  $-\nabla^2 \ln p \preceq \Sigma_2^{-1}$ , we say  $\Sigma_2$  is a **lower variance proxy** for  $p$ .

**Lemma 8.** Consider underdamped Langevin dynamics (18)–(19) with starting distribution  $p_0(x, v)$  that is  $C^2$ . Suppose  $p_0$  has lower (upper) variance proxy  $\Sigma_0$ . Then  $p_t$  has lower (upper) variance proxy

$$\Sigma_t = \exp \left[ \left( \begin{bmatrix} 1 & \\ -1 & -\gamma \end{bmatrix} \otimes \mathbf{I}_d \right) t \right] (\Sigma_0 - \mathbf{I}_{2d}) \exp \left[ \left( \begin{bmatrix} 1 & -1 \\ 1 & -\gamma \end{bmatrix} \otimes \mathbf{I}_d \right) t \right] + \mathbf{I}_{2d}.$$

*Proof.* We first consider discretized Langevin, given by

$$\begin{aligned} \tilde{x}_{t+\eta} &= \tilde{x}_t + \eta \tilde{v}_t \\ \tilde{v}_{t+\eta} &= (1 - \eta\gamma) \tilde{v}_t - \eta \tilde{x}_t + \xi_t, \quad \xi_t \sim N(0, 2\eta \mathbf{I}_d) \end{aligned}$$

or in matrix form,

$$\begin{bmatrix} \tilde{x}_{t+\eta} \\ \tilde{v}_{t+\eta} \end{bmatrix} = \begin{bmatrix} \mathbf{I}_d & \eta \mathbf{I}_d \\ -\eta \mathbf{I}_d & (1 - \eta\gamma) \mathbf{I}_d \end{bmatrix} \begin{bmatrix} \tilde{x}_t \\ \tilde{v}_t \end{bmatrix} + \xi_t, \quad \xi_t \sim N \left( 0, \begin{bmatrix} O & O \\ O & 2\eta \mathbf{I}_d \end{bmatrix} \right).$$

Fix  $t$ . Let  $\tilde{p}_t^{(\eta)}$  be the distribution at time  $t$  for discretized Langevin with step size  $\eta$  (dividing  $t$ ). By standard arguments,  $\tilde{p}_t^{(\eta)} \rightarrow p_t$  as  $\eta \rightarrow 0$ , in the  $C^2$  topology on any compact set. In particular, for any  $x, v$ ,  $\nabla^2 \ln \tilde{p}_t^{(\eta)}(x, v) \rightarrow \nabla^2 \ln p_t(x, v)$ . Hence it suffices to bound  $\nabla^2 \ln p_t(x, v)$ .

We write the proof for the upper variance proxy; the proof for the lower variance proxy differs only in the direction of the inequality. Suppose  $-\ln \tilde{p}_t(x, v) \succeq \tilde{\Sigma}_t^{-1}$ . Consider breaking the update into two steps,

$$\begin{aligned} \begin{bmatrix} \tilde{x}'_{t+\eta} \\ \tilde{v}'_{t+\eta} \end{bmatrix} &= \begin{bmatrix} \mathbf{I}_d & \eta \mathbf{I}_d \\ -\eta \mathbf{I}_d & (1 - \eta\gamma) \mathbf{I}_d \end{bmatrix} \begin{bmatrix} \tilde{x}_t \\ \tilde{v}_t \end{bmatrix} \\ \begin{bmatrix} \tilde{x}_{t+\eta} \\ \tilde{v}_{t+\eta} \end{bmatrix} &= \begin{bmatrix} \tilde{x}'_{t+\eta} \\ \tilde{v}'_{t+\eta} \end{bmatrix} + \xi_t, \quad \xi_t \sim N \left( 0, \begin{bmatrix} O & O \\ O & 2\eta \mathbf{I}_d \end{bmatrix} \right). \end{aligned}$$

Let  $\tilde{p}'_{t+\eta}(x, v)$  denote the distribution of  $\begin{bmatrix} \tilde{x}'_{t+\eta} \\ \tilde{v}'_{t+\eta} \end{bmatrix}$ . Then

$$\tilde{p}'_{t+\eta}(x, v) = \tilde{p}_t \left( \begin{bmatrix} \mathbf{I}_d & \eta \mathbf{I}_d \\ -\eta \mathbf{I}_d & (1 - \eta\gamma) \mathbf{I}_d \end{bmatrix}^{-1} \begin{bmatrix} x \\ v \end{bmatrix} \right)$$

so

$$\tilde{\Sigma}'_{t+\eta} := \begin{bmatrix} \mathbf{I}_d & \eta \mathbf{I}_d \\ -\eta \mathbf{I}_d & (1 - \eta\gamma) \mathbf{I}_d \end{bmatrix} \tilde{\Sigma}_t \begin{bmatrix} \mathbf{I}_d & -\eta \mathbf{I}_d \\ \eta \mathbf{I}_d & (1 - \eta\gamma) \mathbf{I}_d \end{bmatrix}$$

is an upper variance proxy for  $\tilde{p}'_{t+\eta}$  and by Lemma 7,

$$\tilde{\Sigma}_{t+\eta} := \tilde{\Sigma}'_{t+\eta} + \begin{bmatrix} O & O \\ O & 2\eta \mathbf{I}_d \end{bmatrix}$$

is an upper variance proxy for  $\tilde{p}_{t+\eta}$ . Note that

$$\tilde{\Sigma}_{t+\eta} := \tilde{\Sigma}_t + \left[ \begin{bmatrix} 1 & \\ -1 & -\gamma \end{bmatrix} \otimes \mathbf{I}_d \right] \tilde{S}_t + \tilde{S}_t \left[ \begin{bmatrix} 1 & -1 \\ 1 & -\gamma \end{bmatrix} \otimes \mathbf{I}_d \right] + \begin{bmatrix} 0 & 0 \\ 0 & 2\gamma \end{bmatrix} + O(\eta^2).$$

By the standard analysis of Euler's method, as  $\eta \rightarrow 0$ , the distribution,  $\tilde{\Sigma}_t$  approaches  $\Sigma_t$  defined by

$$\frac{d}{dt} \Sigma_t = \left[ \begin{bmatrix} 1 & \\ -1 & -\gamma \end{bmatrix} \otimes \mathbf{I}_d \right] \Sigma_t + \Sigma_t \left[ \begin{bmatrix} 1 & -1 \\ 1 & -\gamma \end{bmatrix} \otimes \mathbf{I}_d \right] + \begin{bmatrix} 0 & 0 \\ 0 & 2\gamma \end{bmatrix}.$$

This  $\Sigma_t$  is an upper variance proxy for  $p_t$ . The solution to this equation is

$$\Sigma_t = \exp \left[ \left( \begin{bmatrix} 1 & \\ -1 & -\gamma \end{bmatrix} \otimes \mathbf{I}_d \right) t \right] (\Sigma_0 - \mathbf{I}_{2d}) \exp \left[ \left( \begin{bmatrix} 1 & -1 \\ 1 & -\gamma \end{bmatrix} \otimes \mathbf{I}_d \right) t \right] + \mathbf{I}_{2d},$$

as desired.  $\square$

### A.3 Proof that underdamped Langevin is well-conditioned

We are now ready to prove the main theorem.

*Proof of Theorem 6.* Let  $H_t = \nabla^2(-\ln p_t + \ln p)$  and  $C = \begin{bmatrix} O & I_d \\ -I_d & -\gamma I_d \end{bmatrix}$ . By (22) and the chain rule,

$$\frac{d}{dt} D_t D_t^\top = -(CH_t D_t D_t^\top + D_t D_t^\top H_t C^\top). \quad (23)$$

Fix  $w$  and consider  $y_t = D_t w = D_w T_t(x_0)$ . Multiplying the above by  $W$  on both sides gives<sup>4</sup>

$$\left| \frac{d}{dt} \|y_t\|^2 \right| \leq 2 \|CH_t\| \|y_t\|^2$$

so by Grönwall's inequality (Lemma 15),

$$\exp \left[ -2 \int_0^t \|CH_s\| ds \right] \leq \|y_t\|^2 \leq \exp \left[ 2 \int_0^t \|CH_s\| ds \right]. \quad (24)$$

By Lemma 8,

$$I_{2d} \preceq -\nabla^2 \ln p_t \preceq (\kappa - 1) \exp \left[ \left( \begin{bmatrix} 1 & \\ -1 & -\gamma \end{bmatrix} \otimes I_d \right) t \right] \exp \left[ \left( \begin{bmatrix} -1 & \\ 1 & -\gamma \end{bmatrix} \otimes I_d \right) t \right] + I_{2d}.$$

The eigenvalues of  $A := \begin{bmatrix} 1 & -1 \\ 1 & -\gamma \end{bmatrix}$  are  $\frac{-\gamma \pm \sqrt{\gamma^2 - 4}}{2}$ , which have absolute value 1. The absolute value of the inner product of the eigenvectors of  $A$  is  $\gamma/2$ , so the condition number squared of the two exponential factors is bounded by  $\frac{1 + \frac{\gamma}{2}}{1 - \frac{\gamma}{2}} = \frac{2 + \gamma}{2 - \gamma}$ . In full detail, we calculate

$$\begin{aligned} \exp \left( \begin{bmatrix} 1 & -1 \\ 1 & \gamma \end{bmatrix} t \right) &= \underbrace{\begin{bmatrix} 1 & 1 \\ \frac{\gamma - \sqrt{\gamma^2 - 4}}{2} & \frac{\gamma + \sqrt{\gamma^2 - 4}}{2} \end{bmatrix}}_S \underbrace{\begin{bmatrix} \exp \left( \frac{-\gamma + \sqrt{\gamma^2 - 4}}{2} t \right) & \\ & \exp \left( \frac{-\gamma - \sqrt{\gamma^2 - 4}}{2} t \right) \end{bmatrix}}_D \\ &\cdot \underbrace{\frac{1}{\sqrt{\gamma^2 - 4}} \begin{bmatrix} \frac{\gamma + \sqrt{\gamma^2 - 4}}{2} & -1 \\ -\frac{\gamma - \sqrt{\gamma^2 - 4}}{2} & 1 \end{bmatrix}}_{S^{-1}} \end{aligned}$$

$$\|S^\dagger S\| = \left\| \begin{bmatrix} 2 & \frac{\gamma^2 + \gamma \sqrt{\gamma^2 - 4}}{2} \\ \frac{\gamma^2 - \gamma \sqrt{\gamma^2 - 4}}{2} & 2 \end{bmatrix} \right\| = 2 + \gamma$$

$$\left\| \exp \left( \begin{bmatrix} 1 & -1 \\ 1 & \gamma \end{bmatrix} t \right) \right\| \leq \frac{2 + \gamma}{\sqrt{4 - \gamma^2}} \exp \left( \frac{-\gamma t}{2} \right) = \sqrt{\frac{2 + \gamma}{2 - \gamma}} \exp \left( \frac{-\gamma t}{2} \right).$$

Hence  $H_t = -\nabla^2 \ln p_t + I_{2d}$  satisfies

$$\begin{aligned} \|CH_s\| &\leq 1 - \frac{1}{1 + \frac{2 + \gamma}{2 - \gamma} (\kappa - 1) e^{-\gamma t/2}} \\ \int_0^\infty \|CH_s\| ds &\leq \int_0^\infty \frac{\frac{2 + \gamma}{2 - \gamma} (\kappa - 1) e^{-\gamma t/2}}{1 + \frac{2 + \gamma}{2 - \gamma} (\kappa - 1) e^{-\gamma t/2}} ds \\ &\leq \left[ \frac{2}{\gamma} \ln \left( 1 + \frac{2 + \gamma}{2 - \gamma} (\kappa - 1) e^{-\gamma t/2} \right) \right]_\infty^0 \leq \frac{2}{\gamma} \ln \left( 1 + \frac{2 + \gamma}{2 - \gamma} (\kappa - 1) \right). \end{aligned}$$

<sup>4</sup>The condition number bound in Theorem 6 is the square of what one might expect because we are only able to get obtain a bound on the absolute value here. If this is always increasing or decreasing, then we would save a factor of 2 in the exponent.

Hence by (24),

$$\left(1 + \frac{2 + \gamma}{2 - \gamma}(\kappa - 1)\right)^{-2/\gamma} \leq \|y_t\| \leq \left(1 + \frac{2 + \gamma}{2 - \gamma}(\kappa - 1)\right)^{2/\gamma},$$

giving the theorem. To obtain the bound on condition number, note that the condition number of  $DT_t(x_0)$  is  $\frac{\max_{\|w\|=1} \|D_w T_t(x_0)\|}{\min_{\|w\|=1} \|D_w T_t(x_0)\|}$ .  $\square$

## B Proof of Lemma 3

For the sake of convenience, we restate Lemma 3 again.

**Lemma.** *Let  $\mathcal{C} \in \mathbb{R}^{2d}$  be a compact set. For any function  $H(x, v, t) : \mathbb{R}^{2d} \times \mathbb{R}_{\geq 0} \rightarrow \mathbb{R}$  which is polynomial in  $(x, v)$ , there exist polynomial functions  $J, F, G$ , s.t. the time- $(t_0 + \tau, t_0)$  flow map of the system*

$$\begin{cases} \frac{dx}{dt} = \frac{\partial}{\partial v} H(x, v, t) \\ \frac{dv}{dt} = -\frac{\partial}{\partial x} H(x, v, t) - \gamma \frac{\partial}{\partial v} H(x, v, t) \end{cases} \quad (25)$$

is uniformly  $O(\tau^2)$ -close over  $\mathcal{C}$  in  $C^1$  topology to the time- $2\pi$  map of the system

$$\begin{cases} \frac{dx}{dt} = v - \tau F(v, t) \odot x \\ \frac{dv_j}{dt} = -\Omega_j^2 x_j - \tau J_j(x, t) - \tau v_j G_j(x, t) \end{cases} \quad (26)$$

for some integers  $\{\Omega_j\}_{j=1}^d$ . Here,  $\odot$  denotes component-wise product, and the constants inside the  $O(\cdot)$  depend on  $\mathcal{C}$  and the coefficients of  $H$ .

*Proof.* First, note that the time- $(t_0 + \tau, t_0)$  flow map of (25) is equal to the time- $(t_0, t_0 + \tau)$  flow map of the system:

$$\begin{cases} \frac{dx}{dt} = -\frac{\partial}{\partial v} H(x, v, t_0 + \tau - t) \\ \frac{dv}{dt} = \frac{\partial}{\partial x} H(x, v, t_0 + \tau - t) + \gamma \frac{\partial}{\partial v} H(x, v, t_0 + \tau - t) \end{cases} \quad (27)$$

Proceeding ahead, we broadly follow the proof strategy in Turaev [2002]. For notational convenience, let's denote the initial vector by  $x(0), v(0)$  (each coordinate is specified separately). Let

$$x_j^0(t) = x_j(0) \cos \Omega_j t + \frac{1}{\Omega_j} v_j(0) \sin \Omega_j t \quad (28)$$

$$v_j^0(t) = -\Omega_j x_j(0) \sin \Omega_j t + v_j(0) \cos \Omega_j t. \quad (29)$$

Using perturbative ODE techniques (see appendix D.5), the solution to (26) satisfies

$$\begin{cases} x(t) = x^0(t) - \tau \int_0^t \left( \frac{1}{\Omega} \odot J(x^0(s), s) \odot \sin \Omega(t-s) + F(v^0(s), s) \odot \cos \Omega(t-s) \odot x^0(s) \right. \\ \quad \left. + \frac{1}{\Omega} \odot G(x^0(s), s) \odot \sin \Omega(t-s) \odot v^0(s) \right) ds + O(\tau^2) \\ v(t) = v^0(t) - \tau \int_0^t \left( J(x^0(s), s) \odot \cos \Omega(t-s) - \Omega \odot F(v^0(s), s) \odot \sin \Omega(t-s) \odot x^0(s) \right. \\ \quad \left. + G(x^0(s), s) \odot \cos \Omega(t-s) \odot v^0(s) \right) ds + O(\tau^2) \end{cases} \quad (30)$$

Substituting  $t = 2\pi$ , the time- $2\pi$  map of (26) is given by

$$\begin{cases} x(2\pi) = x^0(2\pi) - \tau \int_0^{2\pi} \left( -\frac{1}{\Omega} \odot J(x^0(s), s) \odot \sin \Omega s + F(v^0(s), s) \odot \cos \Omega s \odot x^0(s) \right. \\ \quad \left. - \frac{1}{\Omega} \odot G(x^0(s), s) \odot \sin \Omega s \odot v^0(s) \right) ds + O(\tau^2) \\ v(2\pi) = v^0(2\pi) - \tau \int_0^{2\pi} \left( J(x^0(s), s) \odot \cos \Omega s + \Omega \odot F(v^0(s), s) \odot \sin \Omega s \odot x^0(s) \right. \\ \quad \left. + G(x^0(s), s) \odot \cos \Omega s \odot v^0(s) \right) ds + O(\tau^2) \end{cases} \quad (31)$$

Note that this holds if  $\Omega$  is integral, and we will choose it to be so.

On the other hand, using Taylor's theorem, the solution to (25) satisfies:

$$\begin{cases} x(\tau) = x(0) - \tau \frac{\partial}{\partial v} H(x(0), v(0), t_0 + \tau) + O(\tau^2) \\ v(\tau) = v(0) + \tau \frac{\partial}{\partial x} H(x(0), v(0), t_0 + \tau) + \tau \gamma \frac{\partial}{\partial v} H(x(0), v(0), t_0 + \tau) + O(\tau^2) \end{cases} \quad (32)$$

We will now show that for any two polynomials  $r_1, r_2$  of total degree at most  $M$  we can choose functions  $J, F, G$ , s.t.:

$$\begin{cases} \int_0^{2\pi} \left( -\frac{1}{\Omega} \odot J(x^0(s), s) \odot \sin \Omega s + F(v^0(s), s) \odot \cos \Omega s \odot x^0(s) \right. \\ \quad \left. - \frac{1}{\Omega} \odot G(x^0(s), s) \odot \sin \Omega s \odot v^0(s) \right) ds = r_1(x(0), y(0)) \\ \int_0^{2\pi} \left( J(x^0(s), s) \odot \cos \Omega s + \Omega \odot F(v^0(s), s) \odot \sin \Omega s \odot x^0(s) \right. \\ \quad \left. + G(x^0(s), s) \odot \cos \Omega s \odot v^0(s) \right) ds = r_2(x(0), y(0)) \end{cases} \quad (33)$$

We will choose  $J, F, G$  of the form:

$$\begin{cases} \forall j \in [d] : J_j(z, t) = \sum_{\mathbf{i}: |\mathbf{i}| \leq M} v_{j,\mathbf{i}}^J(t) z^{\mathbf{i}} \\ \forall j \in [d] : F_j(z, t) = \sum_{\mathbf{i}: |\mathbf{i}| \leq M-1} v_{j,\mathbf{i}}^F(t) z^{\mathbf{i}} \\ \forall j \in [d] : G_j(z, t) = \sum_{\mathbf{i}: |\mathbf{i}| \leq M-1} v_{j,\mathbf{i}}^G(t) z^{\mathbf{i}} \end{cases} \quad (34)$$

where  $\mathbf{i} = (i_1, \dots, i_d)$  denotes multi-index, and  $|\mathbf{i}| = \sum_{k=1}^d i_k$  and  $z^{\mathbf{i}} = \prod_{k=1}^d z_k^{i_k}$ . Let

$$r_{1,j}(x(0), v(0)) = \sum_{\mathbf{k}: |\mathbf{k}| \leq M} \sum_{\mathbf{p}+\mathbf{q}=\mathbf{k}} h_{j,\mathbf{p},\mathbf{q}}^1 x(0)^{\mathbf{p}} v(0)^{\mathbf{q}} \quad (35)$$

$$r_{2,j}(x(0), v(0)) = \sum_{\mathbf{k}: |\mathbf{k}| \leq M} \sum_{\mathbf{p}+\mathbf{q}=\mathbf{k}} h_{j,\mathbf{p},\mathbf{q}}^2 x(0)^{\mathbf{p}} v(0)^{\mathbf{q}} \quad (36)$$

The equation (33) gives us that for all  $j$ ,

$$\begin{cases} \int_0^{2\pi} \left( -\frac{1}{\Omega_j} J_j(x^0(s), s) \sin(\Omega_j s) + F_j(v^0(s), s) \cos(\Omega_j s) x_j^0(s) \right. \\ \quad \left. - \frac{1}{\Omega_j} G_j(x^0(s), s) \sin(\Omega_j s) v_j^0(s) \right) ds = r_{1,j}(x(0), y(0)) \\ \int_0^{2\pi} \left( J_j(x^0(s), s) \cos(\Omega_j s) + \Omega_j F_j(v^0(s), s) \sin(\Omega_j s) x_j^0(s) \right. \\ \quad \left. + G_j(x^0(s), s) \cos(\Omega_j s) v_j^0(s) \right) ds = r_{2,j}(x(0), y(0)) \end{cases} \quad (37)$$

Let  $\binom{\mathbf{k}}{\mathbf{p}} = \prod_{k=1}^d \binom{k_i}{p_i}$ . Let  $\mathbf{k}_j^t$  be the multi-index  $(k_1, \dots, k_j + t, \dots, k_d)$ . We substitute (28)–(29), (34), and (35)–(36) into (37) and match the coefficients of  $x(0)^{\mathbf{p}} v(0)^{\mathbf{q}}$ .

If  $k_j = 0$ , then

$$\begin{aligned} h_{j,\mathbf{p},\mathbf{q}}^1 &= \int_0^{2\pi} -\frac{1}{\Omega_j} v_{j,\mathbf{k}}^J \cos(\Omega s)^{\mathbf{p}} \sin(\Omega s)^{\mathbf{q}_j^1} \binom{\mathbf{k}}{\mathbf{p}} ds \\ h_{j,\mathbf{p},\mathbf{q}}^2 &= \int_0^{2\pi} v_{j,\mathbf{k}}^J \cos(\Omega s)^{\mathbf{p}_j^1} \sin(\Omega s)^{\mathbf{q}} \binom{\mathbf{k}}{\mathbf{p}} ds \end{aligned}$$

where  $v_{j,\mathbf{k}}^J = a \cos(\Omega s)^{\mathbf{p}} \sin(\Omega s)^{\mathbf{q}_j^1} + b \cos(\Omega s)^{\mathbf{p}_j^1} \sin(\Omega s)^{\mathbf{q}}$ . Since the function  $\delta(s) = \cos(\Omega s)^{\mathbf{p}+\mathbf{p}_j^1} \sin(\Omega s)^{\mathbf{q}+\mathbf{q}_j^1}$  satisfies  $\delta(\pi - s) = -\delta(\pi + s)$ , this function integrates to zero, and hence the system above reduces to

$$\begin{aligned} h_{j,\mathbf{p},\mathbf{q}}^1 &= a \frac{1}{\Omega_j} C \binom{\mathbf{k}}{\mathbf{p}} \\ h_{j,\mathbf{p},\mathbf{q}}^2 &= b C \binom{\mathbf{k}}{\mathbf{p}} \end{aligned}$$

for some non-zero constant

$$C = \int_0^{2\pi} \cos(\Omega s)^{2\mathbf{p}} \sin(\Omega s)^{2\mathbf{q}_j^1} ds = \int_0^{2\pi} \cos(\Omega s)^{2\mathbf{p}_j^1} \sin(\Omega s)^{2\mathbf{q}} ds$$

Note that the integral is non-zero since the function inside is positive as all the powers are even.

If  $k_j > 0$ , then substituting the forms of  $x^0(s)$ ,  $v^0(s)$  from (28) in the LHS of (37), and expanding using the binomial theorem, we get that

$$\begin{aligned}
h_{j,\mathbf{p},\mathbf{q}}^1 &= \frac{1}{\Omega^{\mathbf{q}_j^1}} \int_0^{2\pi} -v_{j,\mathbf{k}}^J \cos(\Omega s)^{\mathbf{p}} \sin(\Omega s)^{\mathbf{q}_j^1} \binom{\mathbf{k}}{\mathbf{p}} ds \\
&\quad + \Omega^{\mathbf{p}_j^{-1}} \int_0^{2\pi} v_{j,\mathbf{k}_j^{-1}}^F (-\mathbf{1})^{\mathbf{p}_j^{-1}} \sin(\Omega s)^{\mathbf{p}_j^{-1}} \cos(\Omega s)^{\mathbf{q}_j^2} \binom{\mathbf{k}_j^{-1}}{\mathbf{p}_j^{-1}} ds \\
&\quad + \Omega^{\mathbf{p}_j^{-1}} \int_0^{2\pi} v_{j,\mathbf{k}_j^{-1}}^F (-\mathbf{1})^{\mathbf{p}} \sin(\Omega s)^{\mathbf{p}_j^1} \cos(\Omega s)^{\mathbf{q}} \binom{\mathbf{k}_j^{-1}}{\mathbf{p}} ds \\
&\quad + \frac{1}{\Omega^{\mathbf{q}}} \int_0^{2\pi} \left( v_{j,\mathbf{k}_j^{-1}}^G \cos(\Omega s)^{\mathbf{p}_j^{-1}} \sin(\Omega s)^{\mathbf{q}_j^2} \binom{\mathbf{k}_j^{-1}}{\mathbf{p}_j^{-1}} - v_{j,\mathbf{k}_j^{-1}}^G \cos(\Omega s)^{\mathbf{p}_j^1} \sin(\Omega s)^{\mathbf{q}} \binom{\mathbf{k}_j^{-1}}{\mathbf{p}} \right) ds \\
h_{j,\mathbf{p},\mathbf{q}}^2 &= \frac{1}{\Omega^{\mathbf{q}}} \int_0^{2\pi} v_{j,\mathbf{k}}^J \cos(\Omega s)^{\mathbf{p}_j^1} \sin(\Omega s)^{\mathbf{q}} \binom{\mathbf{k}}{\mathbf{p}} ds \\
&\quad + \Omega^{\mathbf{p}} \int_0^{2\pi} v_{j,\mathbf{k}_j^{-1}}^F (-\mathbf{1})^{\mathbf{p}_j^{-1}} \sin(\Omega s)^{\mathbf{p}} \cos(\Omega s)^{\mathbf{q}_j^1} \binom{\mathbf{k}_j^{-1}}{\mathbf{p}_j^{-1}} ds \\
&\quad + \Omega^{\mathbf{p}} \int_0^{2\pi} v_{j,\mathbf{k}_j^{-1}}^F (-\mathbf{1})^{\mathbf{p}} \sin(\Omega s)^{\mathbf{p}_j^2} \cos(\Omega s)^{\mathbf{q}_j^{-1}} \binom{\mathbf{k}_j^{-1}}{\mathbf{p}} ds \\
&\quad + \frac{1}{\Omega^{\mathbf{q}_j^{-1}}} \int_0^{2\pi} \left( -v_{j,\mathbf{k}_j^{-1}}^G \cos(\Omega s)^{\mathbf{p}} \sin(\Omega s)^{\mathbf{q}_j^1} \binom{\mathbf{k}_j^{-1}}{\mathbf{p}_j^{-1}} + v_{j,\mathbf{k}_j^{-1}}^G \cos(\Omega s)^{\mathbf{p}_j^2} \sin(\Omega s)^{\mathbf{q}_j^{-1}} \binom{\mathbf{k}_j^{-1}}{\mathbf{p}} \right) ds
\end{aligned}$$

Let  $g_{\mathbf{k},\mathbf{p}}(s) = \cos(\Omega s)^{\mathbf{p}} \sin(\Omega s)^{\mathbf{k}-\mathbf{p}}$  for all  $\mathbf{p} \leq \mathbf{k}$ . Crucially, let us assume that  $v_{j,\mathbf{k}}^J$ ,  $v_{j,\mathbf{k}}^F$ ,  $v_{j,\mathbf{k}}^G$  are all of the form

$$\begin{cases} v_{j,\mathbf{k}}^F = \sum_{\mathbf{r} \leq \mathbf{k}_j^2} \alpha_{\mathbf{k}_j^2, \mathbf{r}} g_{\mathbf{k}_j^2, \mathbf{r}}(s) \\ v_{j,\mathbf{k}}^G = \sum_{\mathbf{r} \leq \mathbf{k}_j^2} \beta_{\mathbf{k}_j^2, \mathbf{r}} g_{\mathbf{k}_j^2, \mathbf{r}}(s) \\ v_{j,\mathbf{k}}^J = \sum_{\mathbf{r} \leq \mathbf{k}_j^1} \gamma_{\mathbf{k}_j^1, \mathbf{r}} g_{\mathbf{k}_j^1, \mathbf{r}}(s) \end{cases} \quad (38)$$

Substituting,

$$\begin{aligned}
h_{j,\mathbf{p},\mathbf{q}}^1 &= \frac{1}{\Omega^{\mathbf{q}_j^1}} \int_0^{2\pi} - \sum_{\mathbf{r} \leq \mathbf{k}_j^1} \gamma_{\mathbf{k}_j^1, \mathbf{r}} g_{\mathbf{k}_j^1, \mathbf{r}}(s) g_{\mathbf{k}_j^1, \mathbf{p}}(s) \binom{\mathbf{k}}{\mathbf{p}} ds \\
&\quad + \Omega^{\mathbf{p}_j^{-1}} \int_0^{2\pi} \left( (-\mathbf{1})^{\mathbf{p}_j^{-1}} \sum_{\mathbf{r} \leq \mathbf{k}_j^1} \alpha_{\mathbf{k}_j^1, \mathbf{r}} g_{\mathbf{k}_j^1, \mathbf{r}}(s) g_{\mathbf{k}_j^1, \mathbf{q}_j^2}(s) \binom{\mathbf{k}_j^{-1}}{\mathbf{p}_j^{-1}} + (-\mathbf{1})^{\mathbf{p}} \sum_{\mathbf{r} \leq \mathbf{k}_j^1} \alpha_{\mathbf{k}_j^1, \mathbf{r}} g_{\mathbf{k}_j^1, \mathbf{r}}(s) g_{\mathbf{k}_j^1, \mathbf{q}}(s) \binom{\mathbf{k}_j^{-1}}{\mathbf{p}} \right) ds \\
&\quad + \frac{1}{\Omega^{\mathbf{q}}} \int_0^{2\pi} \left( \sum_{\mathbf{r} \leq \mathbf{k}_j^1} \beta_{\mathbf{k}_j^1, \mathbf{r}} g_{\mathbf{k}_j^1, \mathbf{r}}(s) g_{\mathbf{k}_j^1, \mathbf{p}_j^{-1}}(s) \binom{\mathbf{k}_j^{-1}}{\mathbf{p}_j^{-1}} - \sum_{\mathbf{r} \leq \mathbf{k}_j^1} \beta_{\mathbf{k}_j^1, \mathbf{r}} g_{\mathbf{k}_j^1, \mathbf{r}}(s) g_{\mathbf{k}_j^1, \mathbf{p}_j^1}(s) \binom{\mathbf{k}_j^{-1}}{\mathbf{p}} \right) ds \\
h_{j,\mathbf{p},\mathbf{q}}^2 &= \frac{1}{\Omega^{\mathbf{q}}} \int_0^{2\pi} \sum_{\mathbf{r} \leq \mathbf{k}_j^1} \gamma_{\mathbf{k}_j^1, \mathbf{r}} g_{\mathbf{k}_j^1, \mathbf{r}}(s) g_{\mathbf{k}_j^1, \mathbf{p}_j^1}(s) \binom{\mathbf{k}}{\mathbf{p}} ds \\
&\quad + \Omega^{\mathbf{p}} \int_0^{2\pi} \left( (-\mathbf{1})^{\mathbf{p}_j^{-1}} \sum_{\mathbf{r} \leq \mathbf{k}_j^1} \alpha_{\mathbf{k}_j^1, \mathbf{r}} g_{\mathbf{k}_j^1, \mathbf{r}}(s) g_{\mathbf{k}_j^1, \mathbf{q}_j^1}(s) \binom{\mathbf{k}_j^{-1}}{\mathbf{p}_j^{-1}} + (-\mathbf{1})^{\mathbf{p}} \sum_{\mathbf{r} \leq \mathbf{k}_j^1} \alpha_{\mathbf{k}_j^1, \mathbf{r}} g_{\mathbf{k}_j^1, \mathbf{r}}(s) g_{\mathbf{k}_j^1, \mathbf{q}_j^{-1}}(s) \binom{\mathbf{k}_j^{-1}}{\mathbf{p}} \right) ds \\
&\quad + \frac{1}{\Omega^{\mathbf{q}_j^{-1}}} \int_0^{2\pi} \left( - \sum_{\mathbf{r} \leq \mathbf{k}_j^1} \beta_{\mathbf{k}_j^1, \mathbf{r}} g_{\mathbf{k}_j^1, \mathbf{r}}(s) g_{\mathbf{k}_j^1, \mathbf{p}}(s) \binom{\mathbf{k}_j^{-1}}{\mathbf{p}_j^{-1}} + \sum_{\mathbf{r} \leq \mathbf{k}_j^1} \beta_{\mathbf{k}_j^1, \mathbf{r}} g_{\mathbf{k}_j^1, \mathbf{r}}(s) g_{\mathbf{k}_j^1, \mathbf{p}_j^2}(s) \binom{\mathbf{k}_j^{-1}}{\mathbf{p}} \right) ds
\end{aligned}$$

Now, let  $\langle f, g \rangle = \int_0^{2\pi} f(s)g(s)ds$  denote the  $\ell_2$  inner product. Then, we can rewrite the above system as

$$\begin{aligned}
h_{j,\mathbf{p},\mathbf{q}}^1 &= -\frac{1}{\Omega_j^{\mathbf{q}_j^1}} \sum_{\mathbf{r} \leq \mathbf{k}_j^1} \gamma_{\mathbf{k}_j^1, \mathbf{r}} \langle g_{\mathbf{k}_j^1, \mathbf{r}}(s), g_{\mathbf{k}_j^1, \mathbf{p}}(s) \rangle \binom{\mathbf{k}}{\mathbf{p}} \\
&\quad + \Omega_j^{\mathbf{p}_j^{-1}} \left[ (-1)^{\mathbf{p}_j^{-1}} \sum_{\mathbf{r} \leq \mathbf{k}_j^1} \alpha_{\mathbf{k}_j^1, \mathbf{r}} \langle g_{\mathbf{k}_j^1, \mathbf{r}}(s), g_{\mathbf{k}_j^1, \mathbf{q}_j^2}(s) \rangle \binom{\mathbf{k}_j^{-1}}{\mathbf{p}_j^{-1}} + (-1)^{\mathbf{p}} \sum_{\mathbf{r} \leq \mathbf{k}_j^1} \alpha_{\mathbf{k}_j^1, \mathbf{r}} \langle g_{\mathbf{k}_j^1, \mathbf{r}}(s), g_{\mathbf{k}_j^1, \mathbf{q}}(s) \rangle \binom{\mathbf{k}_j^{-1}}{\mathbf{p}} \right] \\
&\quad + \frac{1}{\Omega_j^{\mathbf{q}}} \left[ \sum_{\mathbf{r} \leq \mathbf{k}_j^1} \beta_{\mathbf{k}_j^1, \mathbf{r}} \langle g_{\mathbf{k}_j^1, \mathbf{r}}(s), g_{\mathbf{k}_j^1, \mathbf{p}_j^{-1}}(s) \rangle \binom{\mathbf{k}_j^{-1}}{\mathbf{p}_j^{-1}} - \sum_{\mathbf{r} \leq \mathbf{k}_j^1} \beta_{\mathbf{k}_j^1, \mathbf{r}} \langle g_{\mathbf{k}_j^1, \mathbf{r}}(s), g_{\mathbf{k}_j^1, \mathbf{p}_j^1}(s) \rangle \binom{\mathbf{k}_j^{-1}}{\mathbf{p}} \right] \\
h_{j,\mathbf{p},\mathbf{q}}^2 &= \frac{1}{\Omega_j^{\mathbf{q}}} \sum_{\mathbf{r} \leq \mathbf{k}_j^1} \gamma_{\mathbf{k}_j^1, \mathbf{r}} \langle g_{\mathbf{k}_j^1, \mathbf{r}}(s), g_{\mathbf{k}_j^1, \mathbf{p}_j^1}(s) \rangle \binom{\mathbf{k}}{\mathbf{p}} \\
&\quad + \Omega_j^{\mathbf{p}} \left[ (-1)^{\mathbf{p}_j^{-1}} \sum_{\mathbf{r} \leq \mathbf{k}_j^1} \alpha_{\mathbf{k}_j^1, \mathbf{r}} \langle g_{\mathbf{k}_j^1, \mathbf{r}}(s), g_{\mathbf{k}_j^1, \mathbf{q}_j^1}(s) \rangle \binom{\mathbf{k}_j^{-1}}{\mathbf{p}_j^{-1}} + (-1)^{\mathbf{p}} \sum_{\mathbf{r} \leq \mathbf{k}_j^1} \alpha_{\mathbf{k}_j^1, \mathbf{r}} \langle g_{\mathbf{k}_j^1, \mathbf{r}}(s), g_{\mathbf{k}_j^1, \mathbf{q}_j^{-1}}(s) \rangle \binom{\mathbf{k}_j^{-1}}{\mathbf{p}} \right] \\
&\quad + \frac{1}{\Omega_j^{\mathbf{q}_j^{-1}}} \left[ - \sum_{\mathbf{r} \leq \mathbf{k}_j^1} \beta_{\mathbf{k}_j^1, \mathbf{r}} \langle g_{\mathbf{k}_j^1, \mathbf{r}}(s), g_{\mathbf{k}_j^1, \mathbf{p}}(s) \rangle \binom{\mathbf{k}_j^{-1}}{\mathbf{p}_j^{-1}} + \sum_{\mathbf{r} \leq \mathbf{k}_j^1} \beta_{\mathbf{k}_j^1, \mathbf{r}} \langle g_{\mathbf{k}_j^1, \mathbf{r}}(s), g_{\mathbf{k}_j^1, \mathbf{p}_j^2}(s) \rangle \binom{\mathbf{k}_j^{-1}}{\mathbf{p}} \right]
\end{aligned}$$

Now, we will add a few redundant constraints in the system. These are added to ensure that the system has a nice matrix form; they are all of the type  $0 = 0$ . To do this, we allow  $\mathbf{p} \geq \mathbf{0}_j^{-1}$ , instead of  $\mathbf{p} \geq \mathbf{0}$ . Note that if  $p_j = -1$ , then  $q_j = k_j + 1$  since  $\mathbf{p} + \mathbf{q} = \mathbf{k}$ . Again, we follow the convention that  $\binom{n}{i} = 0$  if  $i < 0$  or  $i > n$ , as well as  $g_{\mathbf{k}, \mathbf{p}} = 0$  if  $\mathbf{p}$  is not between  $\mathbf{0}$  and  $\mathbf{k}$ , both inclusive. Also define  $h_{\mathbf{p}, \mathbf{q}}^1 = h_{\mathbf{p}, \mathbf{q}}^2 = 0$  if either  $\mathbf{p}$  or  $\mathbf{q}$  are not between  $\mathbf{0}$  and  $\mathbf{k}$ . Thus, all the new constraints added are indeed of the type  $0 = 0$ .

After these modifications, the system obtained has one constraint corresponding to  $h_{\mathbf{p}, \mathbf{q}}^t$  for each  $\mathbf{0} \leq \mathbf{q} \leq \mathbf{k}_j^1$  (or equivalently  $\mathbf{0}_j^{-1} \leq \mathbf{p} \leq \mathbf{k}$ ),  $\mathbf{p} + \mathbf{q} = \mathbf{k}$ ,  $t = 1, 2$  with variables  $\alpha_{\mathbf{k}_j^1, \mathbf{r}}, \beta_{\mathbf{k}_j^1, \mathbf{r}}, \gamma_{\mathbf{k}_j^1, \mathbf{r}}$  for  $\mathbf{0} \leq \mathbf{r} \leq \mathbf{k}_j^1$ . Further, let

$$n_{j, \mathbf{k}} = |D_{\mathbf{k}}| \quad D_{\mathbf{k}} = \{\mathbf{r} : \mathbf{0} \leq \mathbf{r} \leq \mathbf{k}\}$$

We will write this system in a matrix form, given by a matrix  $A_{j, \mathbf{k}}$  of dimension  $2n_{j, \mathbf{k}_j^1} \times 3n_{j, \mathbf{k}_j^1}$  such that

$$A_{j, \mathbf{k}} \begin{bmatrix} \alpha \\ \beta \\ \gamma \end{bmatrix} = \begin{bmatrix} h_j^1 \\ h_j^2 \end{bmatrix}$$

Here  $\xi = (\xi_{\mathbf{k}_j^1, \mathbf{r}})$  is the vector of dimension  $n_{j, \mathbf{k}_j^1}$  for  $\xi \in \{\alpha, \beta, \gamma\}$ . For notational convenience, we will fix  $j$  and  $\mathbf{k}$  and denote  $A = A_{j, \mathbf{k}}$ . We will index rows of  $A$  by  $(\mathbf{p}, t)$  and columns by  $(\mathbf{r}, \xi)$  where  $\mathbf{r}, \mathbf{p}_j^1 \in D_{\mathbf{k}_j^1}$ ,  $t \in \{1, 2\}$ ,  $\xi \in \{\alpha, \beta, \gamma\}$ . Further, we will denote by  $A_{t, \xi}$  the submatrix of  $A$  corresponding to the rows  $(\mathbf{p}, t)$  and columns  $(\mathbf{r}, \xi)$ , that is,  $A_{t, \xi}(\mathbf{p}, \mathbf{r}) = A((\mathbf{p}, t), (\mathbf{r}, \xi))$ . Matrix  $A$  has only  $2n_{j, \mathbf{k}}$  non-trivial rows, namely the rows which correspond to  $\mathbf{p}$  such that  $\mathbf{p} \geq \mathbf{0}$ . Hence to show that the system above has a solution, it suffices to prove that matrix  $A$  has rank  $2n_{j, \mathbf{k}}$ .

Define  $X, Y$  to be  $n_{j, \mathbf{k}} \times n_{j, \mathbf{k}}$  matrices with rows and columns indexed by elements of  $D_{\mathbf{k}}$  such that

$$X(\mathbf{p}, \mathbf{r}) = \langle g_{\mathbf{k}_j^1, \mathbf{r}}, g_{\mathbf{k}_j^1, \mathbf{p}_j^1} \rangle$$

$$Y(\mathbf{p}, \mathbf{r}) = (-1)^{\mathbf{p}_j^1} \langle g_{\mathbf{k}_j^1, \mathbf{r}}, g_{\mathbf{k}_j^1, \mathbf{k}_j^1 - \mathbf{p}_j^1} \rangle$$

Now, assign  $\Omega_1 = 1$ ,  $\Omega_j = \frac{M^j - 1}{M - 1}$  for  $j > 1$ . For this choice of  $\Omega_j$ 's, it is shown in [Turaev \[2002\]](#) that the functions  $g_{\mathbf{k}, \mathbf{s}}$  for  $\mathbf{0} \leq \mathbf{s} \leq \mathbf{k}$  are linearly independent. It follows from this that the matrices  $X$  and  $Y$  are full rank. Let  $P$  be the permutation matrix that takes row  $\mathbf{r}$  of this matrix to row  $\mathbf{r}_j^1$



unless  $r_j = k_j$ , in which case it takes row  $\mathbf{r}$  to  $\mathbf{s}$  where  $s_i = r_i$  for all  $i \neq j$  and  $s_j = -1$ . Thus, for any matrix  $M$ ,  $PM(\mathbf{p}, \mathbf{r}) = M(\mathbf{p}_j^{-1}, \mathbf{r})$  when  $p_j \neq -1$ , and  $PM(\mathbf{p}, \mathbf{r}) = M(\mathbf{p}', \mathbf{r})$  where  $p'_i = p_i$  for  $i \neq j$  and  $p'_j = k_j$  if  $p_j = -1$ . In particular,

$$PX(\mathbf{p}, \mathbf{r}) = X(\mathbf{p}_j^{-1}, \mathbf{r}) = \langle g_{\mathbf{k}_j^1, \mathbf{r}}, g_{\mathbf{k}_j^1, \mathbf{p}} \rangle$$

$$PY(\mathbf{p}, \mathbf{r}) = Y(\mathbf{p}_j^{-1}, \mathbf{r}) = (-1)^{\mathbf{p}} \langle g_{\mathbf{k}_j^1, \mathbf{r}}, g_{\mathbf{k}_j^1, \mathbf{k}_j^1 - \mathbf{p}} \rangle$$

when  $\mathbf{p} \geq \mathbf{0}$ . Define  $n_{j, \mathbf{k}} \times n_{j, \mathbf{k}}$  diagonal matrices  $D_1, D_2, D_3$  such that

$$D_1(\mathbf{p}, \mathbf{p}) = \begin{pmatrix} \mathbf{k}_j^{-1} \\ \mathbf{p} \end{pmatrix} \quad D_2(\mathbf{p}, \mathbf{p}) = \begin{pmatrix} \mathbf{k}_j^{-1} \\ \mathbf{p}_j^{-1} \end{pmatrix} \quad D_3(\mathbf{p}, \mathbf{p}) = \begin{pmatrix} \mathbf{k} \\ \mathbf{p} \end{pmatrix}$$

for  $\mathbf{0}_j^{-1} \leq \mathbf{p} \leq \mathbf{k}$ . Recalling that  $\mathbf{q} = \mathbf{k} - \mathbf{p}$ , we see that

$$\begin{aligned} A_{1, \alpha}(\mathbf{p}, \mathbf{r}) &= \Omega^{\mathbf{p}_j^{-1}} \begin{pmatrix} \mathbf{k}_j^{-1} \\ \mathbf{p}_j^{-1} \end{pmatrix} (-1)^{\mathbf{p}_j^{-1}} \langle g_{\mathbf{k}_j^1, \mathbf{r}}, g_{\mathbf{k}_j^1, \mathbf{k}_j^1 - \mathbf{p}_j^{-1}} \rangle + \Omega^{\mathbf{p}_j^{-1}} \begin{pmatrix} \mathbf{k}_j^{-1} \\ \mathbf{p} \end{pmatrix} (-1)^{\mathbf{p}} \langle g_{\mathbf{k}_j^1, \mathbf{r}}, g_{\mathbf{k}_j^1, \mathbf{k}_j^1 - \mathbf{p}_j^1} \rangle \\ &= \Omega^{\mathbf{p}_j^{-1}} D_2(\mathbf{p}, \mathbf{p}) P^2 Y(\mathbf{p}, \mathbf{r}) - \Omega^{\mathbf{p}_j^{-1}} D_1(\mathbf{p}, \mathbf{p}) Y(\mathbf{p}, \mathbf{r}) \\ \Rightarrow A_{1, \alpha} &= \Omega^{\mathbf{p}_j^{-1}} (D_2 P^2 - D_1) Y \end{aligned}$$

$$\begin{aligned} A_{1, \beta}(\mathbf{p}, \mathbf{r}) &= \frac{1}{\Omega^{\mathbf{q}}} \begin{pmatrix} \mathbf{k}_j^{-1} \\ \mathbf{p}_j^{-1} \end{pmatrix} \langle g_{\mathbf{k}_j^1, \mathbf{r}}, g_{\mathbf{k}_j^1, \mathbf{p}_j^{-1}} \rangle - \frac{1}{\Omega^{\mathbf{q}}} \begin{pmatrix} \mathbf{k}_j^{-1} \\ \mathbf{p} \end{pmatrix} \langle g_{\mathbf{k}_j^1, \mathbf{r}}, g_{\mathbf{k}_j^1, \mathbf{p}_j^1} \rangle \\ &= \frac{1}{\Omega^{\mathbf{q}}} D_2(\mathbf{p}, \mathbf{p}) P^2 X(\mathbf{p}, \mathbf{r}) - \frac{1}{\Omega^{\mathbf{q}}} D_1(\mathbf{p}, \mathbf{p}) X(\mathbf{p}, \mathbf{r}) \\ \Rightarrow A_{1, \beta} &= \frac{1}{\Omega^{\mathbf{q}}} (D_2 P^2 - D_1) X \end{aligned}$$

$$\begin{aligned} A_{1, \gamma}(\mathbf{p}, \mathbf{r}) &= -\frac{1}{\Omega^{\mathbf{q}_j^1}} \begin{pmatrix} \mathbf{k} \\ \mathbf{p} \end{pmatrix} \langle g_{\mathbf{k}_j^1, \mathbf{r}}, g_{\mathbf{k}_j^1, \mathbf{p}} \rangle \\ &= -\frac{1}{\Omega^{\mathbf{q}_j^1}} D_3(\mathbf{p}, \mathbf{p}) P X(\mathbf{p}, \mathbf{r}) \\ \Rightarrow A_{1, \gamma} &= -\frac{1}{\Omega^{\mathbf{q}_j^1}} D_3 P X \end{aligned}$$

$$\begin{aligned} A_{2, \alpha}(\mathbf{p}, \mathbf{r}) &= \Omega^{\mathbf{p}} \begin{pmatrix} \mathbf{k}_j^{-1} \\ \mathbf{p}_j^{-1} \end{pmatrix} (-1)^{\mathbf{p}_j^{-1}} \langle g_{\mathbf{k}_j^1, \mathbf{r}}, g_{\mathbf{k}_j^1, \mathbf{k}_j^1 - \mathbf{p}} \rangle + \Omega^{\mathbf{p}} \begin{pmatrix} \mathbf{k}_j^{-1} \\ \mathbf{p} \end{pmatrix} (-1)^{\mathbf{p}} \langle g_{\mathbf{k}_j^1, \mathbf{r}}, g_{\mathbf{k}_j^1, \mathbf{k}_j^1 - \mathbf{p}_j^2} \rangle \\ &= -\Omega^{\mathbf{p}} D_2(\mathbf{p}, \mathbf{p}) P Y(\mathbf{p}, \mathbf{r}) + \Omega^{\mathbf{p}} D_1(\mathbf{p}, \mathbf{p}) P^{-1} Y(\mathbf{p}, \mathbf{r}) \\ \Rightarrow A_{2, \alpha} &= \Omega^{\mathbf{p}} (-D_2 P + D_1 P^{-1}) Y \end{aligned}$$

$$\begin{aligned} A_{2, \beta}(\mathbf{p}, \mathbf{r}) &= -\frac{1}{\Omega^{\mathbf{q}_j^{-1}}} \begin{pmatrix} \mathbf{k}_j^{-1} \\ \mathbf{p}_j^{-1} \end{pmatrix} \langle g_{\mathbf{k}_j^1, \mathbf{r}}, g_{\mathbf{k}_j^1, \mathbf{p}} \rangle + \frac{1}{\Omega^{\mathbf{q}_j^{-1}}} \begin{pmatrix} \mathbf{k}_j^{-1} \\ \mathbf{p} \end{pmatrix} \langle g_{\mathbf{k}_j^1, \mathbf{r}}, g_{\mathbf{k}_j^1, \mathbf{p}_j^2} \rangle \\ &= -\frac{1}{\Omega^{\mathbf{q}_j^{-1}}} D_2(\mathbf{p}, \mathbf{p}) P X(\mathbf{p}, \mathbf{r}) + \frac{1}{\Omega^{\mathbf{q}_j^{-1}}} D_1(\mathbf{p}, \mathbf{p}) P^{-1} X(\mathbf{p}, \mathbf{r}) \\ \Rightarrow A_{2, \beta} &= \frac{1}{\Omega^{\mathbf{q}_j^{-1}}} (-D_2 P + D_1 P^{-1}) X \end{aligned}$$

$$\begin{aligned} A_{2, \gamma}(\mathbf{p}, \mathbf{r}) &= \frac{1}{\Omega^{\mathbf{q}}} \begin{pmatrix} \mathbf{k} \\ \mathbf{p} \end{pmatrix} \langle g_{\mathbf{k}_j^1, \mathbf{r}}, g_{\mathbf{k}_j^1, \mathbf{p}_j^1} \rangle \\ &= \frac{1}{\Omega^{\mathbf{q}}} D_3(\mathbf{p}, \mathbf{p}) X(\mathbf{p}, \mathbf{r}) \\ \Rightarrow A_{2, \gamma} &= \frac{1}{\Omega^{\mathbf{q}}} D_3 X \end{aligned}$$

For the above equations to go through as is, we need to check the case when  $p_j = -1$ , since definitions of  $PX$  and  $PY$  are different for this case. But, in this case,  $D_1(\mathbf{p}, \mathbf{p}) = D_2(\mathbf{p}, \mathbf{p}) = 0$ ,

and hence the equations hold. Similarly, we need to check the case  $p_j = 0$  for blocks  $A_{1,\alpha}$  and  $A_{1,\beta}$ , but again,  $D_2(\mathbf{p}, \mathbf{p}) = 0$  and hence the equations hold. Thus, we can write  $A$  as

$$\begin{bmatrix} \mathbf{I} & 0 \\ 0 & \Omega_j \mathbf{I} \end{bmatrix} \begin{bmatrix} D_2 P^2 - D_1 & D_2 P^2 - D_1 & -D_3 P \\ -D_2 P + D_1 P^{-1} & -D_2 P + D_1 P^{-1} & D_3 \end{bmatrix} \begin{bmatrix} \Omega^{p_j-1} \mathbf{I} & 0 & 0 \\ 0 & \frac{1}{\Omega^q} \mathbf{I} & 0 \\ 0 & 0 & \frac{1}{\Omega^{q_j}} \mathbf{I} \end{bmatrix} \begin{bmatrix} Y & 0 & 0 \\ 0 & X & 0 \\ 0 & 0 & X \end{bmatrix}$$

To show that  $A$  has rank  $2n_{j,k}$ , it suffices to show that the matrix

$$B = \begin{bmatrix} D_2 P^2 - D_1 & -D_3 P \\ -D_2 P + D_1 P^{-1} & D_3 \end{bmatrix}$$

has rank  $2n_{j,k}$ . Let us index rows of  $B$  using  $(\mathbf{p}, s)$  and columns using  $(\mathbf{p}, t)$  for  $s, t \in \{1, 2\}$ . Since  $P$  is a permutation matrix, post multiplying by  $P$  takes column  $\mathbf{r}$  of this matrix to column  $\mathbf{r}_j^{-1}$ , where the indices cycle whenever they are out of bounds. More specifically,

$$MP(\mathbf{p}, \mathbf{r}) = P^{-1}M^\top(\mathbf{r}, \mathbf{p}) = M^\top(\mathbf{r}_j^1, \mathbf{p}) = M(\mathbf{p}, \mathbf{r}_j^1).$$

Hence, for a fixed row  $(\mathbf{p}, 1)$  the non-zero entries in  $B$  are in columns  $(\mathbf{p}_j^{-2}, 1), (\mathbf{p}, 1), (\mathbf{p}_j^{-1}, 2)$ . Similarly, non-zero entries in the row  $(\mathbf{p}, 2)$  are in columns  $(\mathbf{p}_j^{-1}, 1), (\mathbf{p}_j^1, 1), (\mathbf{p}, 2)$ . Observe that rows  $(\mathbf{p}_j^1, 1)$  and  $(\mathbf{p}, 2)$  have non-zero entries in the same columns. This gives us a procedure to convert this matrix into a lower triangular matrix using row operations, where indices are ordered using any order  $<_R$  that respects

1.  $(\mathbf{p}, t) <_R (\mathbf{q}, t)$  if  $p_j < q_j$
2.  $(\mathbf{p}, 1) <_R (\mathbf{q}, 2)$  for all  $\mathbf{0}_j^{-1} \leq \mathbf{p}, \mathbf{q} \leq \mathbf{k}$

In particular, any lexicographical ordering with highest priority to the  $j^{\text{th}}$  coordinate works.

Note that only upper triangular non-zero entries using any such ordering are of the type  $((\mathbf{p}_j^1, 1), (\mathbf{p}, 2))$ . Now, we eliminate these using the following row operations:

$$R(\mathbf{p}_j^1, 1) \leftarrow R(\mathbf{p}_j^1, 1) + C_{\mathbf{p}} R(\mathbf{p}, 2)$$

for all  $\mathbf{p}$  such that  $\mathbf{0} \leq \mathbf{p} \leq \mathbf{k}_j^{-1}$ . Here

$$C_{\mathbf{p}} = -\frac{B((\mathbf{p}_j^1, 1), (\mathbf{p}, 2))}{B((\mathbf{p}, 2), (\mathbf{p}, 2))} = -\frac{-\binom{\mathbf{k}}{\mathbf{p}_j^1}}{\binom{\mathbf{k}}{\mathbf{p}}} = \frac{\binom{k_j}{p_j+1}}{\binom{k_j}{p_j}} = \frac{k_j - p_j}{p_j + 1}$$

Note that after this set of operations,  $B((\mathbf{p}_j^1, 1), (\mathbf{p}, 2)) \leftarrow 0$ . On the other hand,

$$\begin{aligned} B((\mathbf{p}_j^1, 1), (\mathbf{p}_j^1, 1)) &\leftarrow B((\mathbf{p}_j^1, 1), (\mathbf{p}_j^1, 1)) + \frac{k_j - p_j}{p_j + 1} B((\mathbf{p}, 2), (\mathbf{p}_j^1, 1)) \\ &= -\binom{\mathbf{k}_j^{-1}}{\mathbf{p}_j^1} + \frac{k_j - p_j}{p_j + 1} \binom{\mathbf{k}_j^{-1}}{\mathbf{p}} \\ &= \binom{\mathbf{k}_j^{-1}}{\mathbf{p}} \left( -\frac{k_j - p_j - 1}{p_j + 1} + \frac{k_j - p_j}{p_j + 1} \right) \\ &= \frac{1}{p_j + 1} \binom{\mathbf{k}_j^{-1}}{\mathbf{p}} \neq 0 \end{aligned}$$

The only non-zero entries in the upper triangle after this operation corresponds to positions  $((\mathbf{p}_j^1, 1), (\mathbf{p}, 2))$ , for  $\mathbf{0}_j^{-1} \leq \mathbf{p} \leq \mathbf{k}_j^{-1}$ , such that  $p_j = -1$ . To eliminate these, we perform the following row operations:

$$R(\mathbf{p}_j^1, 1) \leftrightarrow R(\mathbf{p}, 2)$$

for all  $\mathbf{0}_j^{-1} \leq \mathbf{p} \leq \mathbf{k}_j^{-1}$  such that  $p_j = -1$ . Hence,

$$B((\mathbf{p}, 2), (\mathbf{p}, 2)) \leftarrow B((\mathbf{p}_j^1, 1), (\mathbf{p}, 2)) = \binom{\mathbf{k}}{\mathbf{p}_j^1} \neq 0$$

Note that  $R(\mathbf{p}, 2) = 0$  since this row corresponds to a dummy constraint. Also, the other two non-zero entries in  $R(\mathbf{p}_j^1, 1)$  are in the first half, and hence this does not create any upper triangular entries. Hence, this matrix is in fact lower triangular, in the given ordering  $<_R$  of indices.

After the operations, among the diagonal terms,  $B((\mathbf{p}, 2), (\mathbf{p}, 2)) \neq 0$  for  $\mathbf{0}_j^{-1} \leq \mathbf{p} \leq \mathbf{k}$ . Also,  $B((\mathbf{p}, 1), (\mathbf{p}, 1)) \neq 0$  for  $\mathbf{0}_j^1 \leq \mathbf{p} \leq \mathbf{k}$ . Therefore, the total number of non-zero diagonal entries is

$$n_{j,\mathbf{k}} \left( \frac{k_j + 1}{k_j} + \frac{k_j - 1}{k_j} \right) = 2n_{j,\mathbf{k}}$$

This proves that the matrix has rank  $2n_{j,\mathbf{k}}$ , which is the same as the number of non-trivial rows, and hence the system has a solution for any  $r_1, r_2$ . Consequently, we can always find polynomial functions  $J, F, G$  as required.  $\square$

## C Proof of Lemma 5

*Proof.* From Lemma 2, it suffices to focus on  $H$  being a polynomial. We break the time from  $\phi$  to 0 for which we want to flow the ODE given by (14) into  $(n + 1)$  small chunks of length  $\tau$ , i.e., let  $\tau = \phi / (n + 1)$ . Further, let  $A_i = T_{(n-i+1)\tau, (n-i)\tau}$ . Then, the time- $\phi$  flow map can be write as the composition of  $n + 1$  maps, that is

$$T_{\phi,0} = T_{\tau,0} \circ \cdots \circ T_{\phi,\phi-\tau} = A_n \circ \cdots \circ A_0$$

Let  $\mathcal{C}_0 = T_{0,\phi}(\mathcal{C})$ . Let  $\mathcal{C}_1, \dots, \mathcal{C}_{n+1}$  be a sequence of compact sets such that  $A_i(\mathcal{C}_i)$  is in the interior of  $\mathcal{C}_{i+1}$ ; by choosing them small enough, we can make  $\mathcal{C}_{n+1}$  an arbitrary compact set containing  $\mathcal{C}$  in its interior. Below, we treat  $A_0, \dots, A_n$  (and their approximations) as maps  $\mathcal{C}_0 \rightarrow \mathcal{C}_1 \rightarrow \cdots \rightarrow \mathcal{C}_{n+1}$ , and when we take the  $C^1$  norm, we do it on the appropriate compact set. For small enough  $\eta$ , the  $\eta$ -discretized maps will stay inside the  $\mathcal{C}_i$ .

Let  $S_i$  denote the time- $2\pi$  flow map obtained by running the ODE system (12) from Lemma 3 above which approximates the map  $T_{(n-i+1)\tau, (n-i)\tau} = A_i$ . Further, let  $S'_i$  denote the map obtained by discretizing the ODE system as in (13) with step size  $\eta$ . Then, we have that for each  $i$ , as  $\eta \rightarrow 0$ ,

$$\begin{aligned} \|S'_i - A_i\|_{C^1} &\leq \|S'_i - S_i + S_i - A_i\|_{C^1} \\ &\leq \|S'_i - S_i\|_{C^1} + \|S_i - A_i\|_{C^1} \\ &\leq O(\eta) + O(\tau^2) \end{aligned} \quad (\text{by Lemmas 3 and 4})$$

We choose  $\eta = \tau^2$ . Using the definition of  $C^1$  norm, this implies that

$$\|S'_i - A_i\| = O(\tau^2) \quad \|DS'_i - DA_i\| = O(\tau^2),$$

where  $\|\cdot\|$  denotes  $L^\infty$  norm on  $\mathcal{C}_i$ ; for matrix-valued functions  $M(x)$  on  $\mathcal{C}_i$ ,  $\|M\| = \sup_{x \in \mathcal{C}_i} \|M(x)\|_2$ , where  $\|\cdot\|_2$  denotes spectral norm. Again, using the definition of the  $C^1$  norm,

$$\begin{aligned} &\|A_n \circ \cdots \circ A_0 - S'_n \circ \cdots \circ S'_0\|_{C^1} \\ &\leq \|A_n \circ \cdots \circ A_0 - S'_n \circ \cdots \circ S'_0\| + \|D(A_n \circ \cdots \circ A_0) - D(S'_n \circ \cdots \circ S'_0)\| \end{aligned}$$

We will bound each term individually. For the first term, note that

$$\begin{aligned} &\|A_n \circ \cdots \circ A_0 - S'_n \circ \cdots \circ S'_0\| \\ &\leq \|A_n \circ \cdots \circ A_1 \circ A_0 - A_n \circ \cdots \circ A_1 \circ S'_0\| + \|A_n \circ \cdots \circ A_1 \circ S'_0 - S'_n \circ \cdots \circ S'_1 \circ S'_0\| \\ &\quad (\text{by triangle inequality}) \\ &= \|T_{\phi-\tau,0} \circ A_0 - T_{\phi-\tau} \circ S'_0\| + \|A_n \circ \cdots \circ A_1 \circ S'_0 - S'_n \circ \cdots \circ S'_1 \circ S'_0\| \\ &\leq \|DT_{\phi-\tau,0}\| \|S'_0 - A_0\| + \|A_n \circ \cdots \circ A_1 \circ S'_0 - S'_n \circ \cdots \circ S'_1 \circ S'_0\| \\ &\leq O(\tau^2) + \|A_n \circ \cdots \circ A_1 \circ S'_0 - S'_n \circ \cdots \circ S'_1 \circ S'_0\| \end{aligned} \quad (39)$$

Observe that

$$\begin{aligned} &\sup_x \|A_n \circ \cdots \circ A_1 \circ S'_0(x) - S'_n \circ \cdots \circ S'_1 \circ S'_0(x)\| \\ &= \sup_{y=S'_0(x)} \|A_n \circ \cdots \circ A_1(y) - S'_n \circ \cdots \circ S'_1(y)\| \\ &\leq \sup_y \|A_n \circ \cdots \circ A_1(y) - S'_n \circ \cdots \circ S'_1(y)\| \\ &= \|A_n \circ \cdots \circ A_1(y) - S'_n \circ \cdots \circ S'_1(y)\| \end{aligned} \quad (40)$$

Using (40), (39), and induction, we get that

$$\|A_n \circ \dots \circ A_0 - S'_n \circ \dots \circ S'_0\| \leq O(n\tau^2)$$

Now, we bound the derivatives:

$$\begin{aligned}
& \|D(A_n \circ \dots \circ A_0) - D(S'_n \circ \dots \circ S'_0)\| \\
& \leq \|D(A_n \circ \dots \circ A_1 \circ A_0) - D(A_n \circ \dots \circ A_1 \circ S'_0)\| \\
& \quad + \|D(A_n \circ \dots \circ A_1 \circ S'_0) - D(S'_n \circ \dots \circ S'_1 \circ S'_0)\| \quad (\text{by triangle inequality}) \\
& = \sup_x \|DT_{\phi-\tau,0}|_{A_0(x)} DA_0(x) - DT_{\phi-\tau,0}|_{S'_0(x)} DS'_0(x)\| \\
& \quad + \sup_x \|D(A_n \circ \dots \circ A_1)|_{S'_0(x)} DS'_0(x) - D(S'_n \circ \dots \circ S'_1)|_{S'_0(x)} DS'_0(x)\| \quad (\text{by chain rule}) \\
& \leq \sup_x \|DT_{\phi-\tau,0}|_{A_0(x)} DA_0(x) - DT_{\phi-\tau,0}|_{S'_0(x)} DA_0(x)\| \\
& \quad + \sup_x \|DT_{\phi-\tau,0}|_{S'_0(x)} DA_0(x) - DT_{\phi-\tau,0}|_{S'_0(x)} DS'_0(x)\| \quad (\text{by triangle inequality}) \\
& \quad + \|DS'_0\| \|D(A_n \circ \dots \circ A_1) - D(S'_n \circ \dots \circ S'_1)\| \quad (41) \\
& \leq \sup_x \|DT_{\phi-\tau,0}|_{A_0(x)} - DT_{\phi-\tau,0}|_{S'_0(x)}\| \|DA_0\| \\
& \quad + \sup_x \|DT_{\phi-\tau,0}|_{S'_0(x)}\| \|DA_0 - DS'_0\| \\
& \quad + \|DS'_0\| \|D(A_n \circ \dots \circ A_1) - D(S'_n \circ \dots \circ S'_1)\| \\
& \leq \|D^2 T_{\phi-\tau,0}\| \|S'_0 - A'_0\| \|DA_0\| + \|DT_{\phi-\tau,0}\| \|DA_0 - DS'_0\| \\
& \quad + \|DS'_0\| \|D(A_n \circ \dots \circ A_1) - D(S'_n \circ \dots \circ S'_1)\| \\
& \leq O(\tau^2) + \left( \|DA_0\| + O(\tau^2) \right) \|D(A_n \circ \dots \circ A_1) - D(S'_n \circ \dots \circ S'_1)\| \quad (42)
\end{aligned}$$

where, for a 3-tensor  $\mathcal{T}$ , we define  $\|\mathcal{T}\| = \sup_{\|u\|=1} \|\mathcal{T}u\|_2$ , where  $\|\mathcal{T}u\|_2$  is the spectral norm of the matrix  $\mathcal{T}u$ , and we define  $\|D^2 T_{\phi-\tau,0}\| = \sup_x \|D^2 T_{\phi-\tau,0}(x)\|$ . In the last step, we use the fact that  $\|DT_{s,t}\|, \|D^2 T_{s,t}\|$  are bounded for all  $s, t > 0$ ; this follows from Lemma 9 below. (Alternatively, note that  $\|DT_{s,t}\|$  can also be more directly bounded by Theorem 6.)

In the above, (41) follows using an argument similar to (40), (42) follows since  $\|DA_0 - DS'_0\| = O(\tau^2)$ . Further, differentiating (46), we get

$$DA_0 = I + \tau D_{(x,v)} F(x, v, t) + O(\tau^2)$$

where  $F$  denotes the defining equation of the ODE system in (14). Therefore, we get

$$\|DA_0\| \leq 1 + \tau L + O(\tau^2)$$

where  $L$  is the upper bound on  $\|Df\|$  over all the appropriate compact sets. Using this bound and induction, we get that

$$\|D(A_n \circ \dots \circ A_0) - D(S'_n \circ \dots \circ S'_0)\| \leq O(n\tau^2)(1 + \tau L + O(\tau^2))^n = O(n\tau^2 e^{n\tau L})$$

for small enough  $\tau$ . Substituting  $n\tau = \phi$ , we get the overall  $C^1$  bound of

$$\|A_n \circ \dots \circ A_0 - S'_n \circ \dots \circ S'_0\|_{C^1} = O(\phi\tau e^{\phi L}).$$

Now, we can choose  $\tau$  small enough so that the two maps are  $\epsilon_1$ -close, finishing the proof.

Concretely, we can write each  $S'_i$  as a composition of affine-coupling maps (which constitute the  $f_1, \dots, f_N$  in the lemma statement). In this manner, we can compose these compositions of affine coupling maps over each  $\tau$ -sized chunk of time so as to get a map which is overall close to the required flow map.  $\square$

**Lemma 9.** Consider the ODE  $\frac{d}{dt}x(t) = F(x(t), t)$  for  $F(x, t)$  that is  $C^\ell$  in  $x \in \mathbb{R}^d$  and continuous in  $t$ . Let  $\mathcal{C}$  be a compact set and suppose solutions exist for any  $(x(0), v(0)) \in \mathcal{C}$  up to time  $T$ . Let  $T_{s,t}$  be the flow map from time  $s$  to time  $t$ , for any  $0 \leq s, t \leq T$ . Then for any  $0 \leq r \leq \ell$ ,  $D^r T_{s,t}$  is bounded on  $T_s(\mathcal{C})$ .

*Proof.* Let  $\partial_{i_1 \dots i_r} = \frac{\partial^r}{\partial x_{i_1} \dots \partial x_{i_r}}$ . Using the chain rule as in Lemma 12, we find by induction that

$$\frac{d}{dt} \partial_{i_1 \dots i_r} (T_t(x)) = \sum_{i=1}^d \partial_i F(x(t), t) \partial_{i_1 \dots i_r} (T_t(x)_i) + G(DF, \dots, D^r F, DT_t, \dots, D^{r-1} T_t). \quad (43)$$

for some polynomial  $G$ . For  $r = 1$ , the differential equation is given by Lemma 12. By a Grönwall argument, a bound on  $DF$  gives an upper and lower bound on the singular values of  $DT_t$  as in (23). We use induction on  $r$ ; for  $r > 1$ , let  $v(t)$  be equal to  $(\partial_{i_1 \dots i_r} (T_t(x)))_{i_1 \dots i_r}$ , written as one large vector. By the chain rule and (43),

$$\frac{d}{dt} \|v(t)\|^2 \leq \langle |v(t)|, A|v(t)| + b \rangle \leq \left( \sigma_{\max}(A) + \frac{1}{2} \right) \|v(t)\|^2 + \frac{1}{2} \|b\|^2$$

for some  $A, b$  depending on  $DF, \dots, D^r F, DT_t, \dots, D^{r-1} T_t$ , where  $\sigma_{\max}$  denotes the maximum singular value and  $|v|$  denotes entrywise absolute value. Grönwall's inequality (Lemma 15) applied to  $\|v(t)\|^2$  then gives bounds on  $\|v(t)\|^2$  and hence  $|\frac{d}{dt} \partial_{i_1 \dots i_r} (T_t(x))|$ . This shows  $D^r T_{s,t}$  is bounded when  $s \leq t$  (by starting the flow at time  $s$ ).

When  $s > t$ , note that the computation of the  $r$ th derivative of an inverse map involves up-to- $r$  derivatives of the forward map, and inverses of the first derivative. As we have a lower bound on the singular value of  $DF$ , this implies that  $D^r T_{s,t}$  is bounded.  $\square$

## D Technical Tools

### D.1 Proof of Lemma 4

We consider a more general ODE than the specific one in (12), of the form

$$\begin{cases} \frac{d}{dt}(x(t)) = f(x(t), v(t), t) \\ \frac{d}{dt}(v(t)) = g(x(t), v(t), t) \end{cases} \quad (44)$$

where  $f, g$  are  $C^2$  functions in  $x, v, t$ . Given a compact set  $\mathcal{C}$ , suppose that the solutions are well-defined for any  $(x(0), v(0)) \in \mathcal{C}$  up to time  $T$ . Consider discretizing these ODEs into steps of size  $\eta$ , as follows:

$$\begin{cases} \tilde{T}_i^x(X_i) = X_{i+1} = X_i + \eta f(X_i, V_{i+1}, t_i) \\ \tilde{T}_i^v(V_i) = V_{i+1} = V_i + \eta g(X_i, V_i, t_i) \end{cases} \quad (45)$$

where  $t_i = i\eta$ . We call this the alternating Euler update. The actual flow maps are given by

$$\begin{cases} T_i^x(x_i) = x_{i+1} = x_i + \eta f(x_i, v_i, t_i) + \int_{i\eta}^{(i+1)\eta} \int_{i\eta}^t x''(s) ds dt \\ T_i^v(v_i) = v_{i+1} = v_i + \eta g(x_i, v_i, t_i) + \int_{i\eta}^{(i+1)\eta} \int_{i\eta}^t v''(s) ds dt \end{cases} \quad (46)$$

We bound the local truncation error. This consists of two parts. First, we have the integral terms in (46):

$$\left\| \begin{bmatrix} \int_{i\eta}^{(i+1)\eta} \int_{i\eta}^t x''(s) ds dt \\ \int_{i\eta}^{(i+1)\eta} \int_{i\eta}^t v''(s) ds dt \end{bmatrix} \right\| \leq \frac{1}{2} \eta^2 \max_{s \in [0, t_i]} \left\| \begin{bmatrix} x''(s) \\ v''(s) \end{bmatrix} \right\|. \quad (47)$$

Second we bound the error from using  $\tilde{v}_{i+1} := v_i + \eta g(x_i, v_i, t_i)$  instead of  $v_i$  in the  $x$  update,

$$\begin{aligned} \|\eta[f(x_i, v_i + \eta g(x_i, v_i, t_i), t_i) - f(x_i, v_i, t_i)]\| &\leq \left\| \eta \int_0^\eta D_v f(x_i, v_i + sg(x_i, v_i, t_i), t_i) g(x_i, v_i, t_i) ds \right\| \\ &\leq \eta^2 \max_{\mathcal{C}'} \|D_v f\| \max_{\mathcal{C}'} \|g\|. \end{aligned} \quad (48)$$

where  $D_v f(x, v, t)$  denotes the Jacobian in the  $v$  variables (rather than the directional derivative), and where we define

$$\mathcal{C}' := \{(x, v + sg(x, v, t), t) : (x, v) = T_t(x_0, v_0) \text{ for some } (x_0, v_0) \in \mathcal{C}, 0 \leq s \leq T\},$$

which ensures that it contains  $(x_i, v_i + sg(x_i, v_i, t_i), t_i)$  and  $(x_i, v_i, t_i)$ . The local truncation error is then at most the sum of (47) and (48).

Supposing that  $\begin{bmatrix} f \\ g \end{bmatrix}$  is  $L$ -Lipschitz in  $(x, v) \in \mathbb{R}^{2d}$  for each  $t$ , we obtain by a standard argument (similar to the proof for the usual Euler's method, see e.g., [Ascher and Greif, 2011, §16.2]) that the global error at any step is bounded by

$$\left\| \begin{bmatrix} \tilde{x}_i \\ \tilde{v}_i \end{bmatrix} - \begin{bmatrix} x_i \\ v_i \end{bmatrix} \right\| \leq \eta \cdot \frac{e^{Lt_i} - 1}{L} \left( \max_{\mathcal{C}'} \|D_v f\| \max_{\mathcal{C}'} \|g\| + \frac{1}{2} \max_{s \in [0, t_i]} \left\| \begin{bmatrix} x''(s) \\ v''(s) \end{bmatrix} \right\| \right). \quad (49)$$

In the case when  $\begin{bmatrix} f \\ g \end{bmatrix}$  is not globally Lipschitz, we show that we can restrict the argument to a compact set on which it is Lipschitz. Let  $\mathcal{C}''$  be a compact set which contains  $\{(x, v, t) : (x, v) = T_t(x_0, v_0) \text{ for some } (x_0, v_0) \in \mathcal{C}, 0 \leq s \leq T\}$  in its interior. Apply the argument to  $\hat{f}$  and  $\hat{g}$  which are defined to be equal to  $f, g$  on  $\mathcal{C}''$ , and are globally Lipschitz. Then the error bound applies to the system defined by  $\hat{f}, \hat{g}$ . Hence, for small enough step size, the trajectory of the discretization stays inside  $\mathcal{C}''$ , and is the same as that for the system defined by  $f, g$ . Then (49) holds for small enough  $\eta$  and  $L$  equal to the Lipschitz constant in  $(x, v)$  on  $\mathcal{C}''$ .

To get a bound in  $C^1$  topology, we need to bound the derivatives of these maps as well. Let  $T_{s,t}(x, v)$  denote the flow map of system (44). Let  $h(x, v, t) = (f(x, v, t), g(x, v, t))$ . Now, consider the system of ODEs

$$\begin{cases} \frac{d}{dt}(x(t)) = f(x(t), v(t), t) \\ \frac{d}{dt}(v(t)) = g(x(t), v(t), t) \\ \frac{d}{dt}(\alpha(t)) = D_{(x,v)} f(x(t), v(t), t) \begin{bmatrix} \alpha(t) \\ \beta(t) \end{bmatrix} \\ \frac{d}{dt}(\beta(t)) = D_{(x,v)} g(x(t), v(t), t) \begin{bmatrix} \alpha(t) \\ \beta(t) \end{bmatrix} \end{cases} \quad (50)$$

where  $\alpha(t), \beta(t)$  are  $d \times 2d$  matrices. Note that setting  $\begin{bmatrix} \alpha(0) \\ \beta(0) \end{bmatrix} = \mathbf{I}_{2d}$  and  $\begin{bmatrix} \alpha(t) \\ \beta(t) \end{bmatrix} = D_{(x,v)} T_{0,t}(x(0), v(0))$  satisfies (50) by Lemma 12.

Now we claim that applying the alternating Euler update to  $(x, \alpha), (v, \beta)$ , the resulting  $(\alpha_i, \beta_i)$  is exactly the Jacobian of the flow map that arises from alternating Euler applied to  $x, v$ . This means that we can bound the errors for  $\alpha, \beta$  using the bound for the alternating Euler method.

The claim follows from noting that the alternating Euler update on  $\alpha, \beta$  is

$$\begin{aligned} \alpha_{i+1} &= (\mathbf{I}_d, O) + D_{(x,v)} f(x_i, v_{i+1}, t_i) \begin{bmatrix} \alpha_i \\ \beta_{i+1} \end{bmatrix} \\ \beta_{i+1} &= (O, \mathbf{I}_d) + D_{(x,v)} g(x_i, v_i, t_i) \begin{bmatrix} \alpha_i \\ \beta_i \end{bmatrix}, \end{aligned}$$

which is the same recurrence that is obtained from differentiating  $X_{i+1}, V_{i+1}$  in (45) with respect to  $X_0, V_0$ , and using the chain rule.

Thus we can apply (49) to get a bound for the Jacobians of the flow map. The constants in the  $O(\eta)$  bound depend on up to the second derivatives of the  $x, v, \alpha, \beta$  for the true solution, Lipschitz constants for  $\begin{bmatrix} f \\ g \end{bmatrix}, D \begin{bmatrix} f \\ g \end{bmatrix}$  (on a suitable compact set), and bounds for  $D_v f, g, D_v D_{(x,v)} f, D_{(x,v)} g$  (on a suitable compact set).

## D.2 Wasserstein bounds

**Lemma 10.** *Given two distributions  $p, q$  and a function  $g$  with Lipschitz constant  $L = \text{Lip}(g)$ ,*

$$W_1(g\#p, g\#q) \leq LW_1(p, q)$$

*Proof.* Let  $\epsilon > 0$ . Then there exists a coupling  $(x, t) \sim \gamma$  such that

$$\int \|x - y\|_2 d\gamma(x, y) \leq W_1(p, q) + \epsilon$$

Consider the coupling  $(x', y')$  given by  $(x', y') = (g(x), g(y))$  where  $(x, y) \sim \gamma$ . Then

$$\begin{aligned} W_1(g_{\#}p, g_{\#}q) &\leq \int \|g(x) - g(y)\|_2 d\gamma(x, y) \\ &\leq \text{Lip}(g) \int \|x - y\| d\gamma(x, y) \\ &\leq LW_1(p, q) + L\epsilon. \end{aligned}$$

Since this holds for all  $\epsilon > 0$ , we get that

$$W_1(g_{\#}p, g_{\#}q) \leq LW_1(p, q)$$

□

**Lemma 11.** *Given two functions  $f, g : \mathbb{R}^d \rightarrow \mathbb{R}^d$  that are uniformly  $\epsilon_1$ -close over a compact set  $\mathcal{C}$  in  $C^1$  topology, and a probability distribution  $p$ ,*

$$W_1(f_{\#}(p|_{\mathcal{C}}), g_{\#}(p|_{\mathcal{C}})) \leq \epsilon_1$$

*Proof.* Consider the coupling  $\gamma$ , where a sample  $(x, y) \sim \gamma$  is generated as follows: first, we sample  $z \sim p|_{\mathcal{C}}$ , and then compute  $x = f(z)$ ,  $y = g(z)$ . By definition of the pushforward, the marginals of  $x$  and  $y$  are  $f_{\#}(p|_{\mathcal{C}})$  and  $g_{\#}(p|_{\mathcal{C}})$  respectively. However, we are given that for this  $\gamma$ ,  $\|x - y\| \leq \epsilon_1$  uniformly. Thus, we can conclude that

$$\begin{aligned} W_1(f_{\#}(p|_{\mathcal{C}}), g_{\#}(p|_{\mathcal{C}})) &\leq \int_{\mathbb{R}^d \times \mathbb{R}^d} \|x - y\|_2 d\gamma(x, y) \\ &\leq \int_{\mathbb{R}^d \times \mathbb{R}^d} \epsilon_1 d\gamma(x, y) = \epsilon_1 \end{aligned}$$

□

### D.3 Proof of Lemma 6

*Proof.* Fix any  $R > 0$ , and set  $\mathcal{C} = B(0, R)$ . Consider the coupling  $(X, Y) \sim \gamma$ , where a sample  $(X, Y)$  is generated as follows: we first sample  $X \sim p^* = \mathcal{N}(0, I_{2d})$ . If  $X \in B(0, R)$ , then we set  $Y = X$ . Else, we draw  $Y$  from  $p^*|_{\mathcal{C}}$ . Clearly, the marginal of  $\gamma$  on  $X$  is  $p$ . Furthermore, since  $p^*$  and  $p^*|_{\mathcal{C}}$  are proportional within  $\mathcal{C}$ , the marginal of  $\gamma$  on  $Y$  is  $p^*|_{\mathcal{C}}$ . Then, we have that

$$\begin{aligned} W_1(p^*, p^*|_{\mathcal{C}}) &\leq \int_{\mathbb{R}^{2d} \times \mathcal{C}} \|x - y\| d\gamma \\ &= \int_{\mathcal{C} \times \mathcal{C}} \|x - y\| d\gamma + \int_{\mathbb{R}^{2d} \setminus \mathcal{C} \times \mathcal{C}} \|x - y\| d\gamma \\ &= \int_{\mathbb{R}^{2d} \setminus \mathcal{C} \times \mathcal{C}} \|x - y\| d\gamma \\ &\leq \int_{\mathbb{R}^{2d} \setminus \mathcal{C} \times \mathcal{C}} (\|x\| + \|y\|) d\gamma \\ &\leq \int_{\mathbb{R}^{2d} \setminus \mathcal{C} \times \mathcal{C}} (\|x\| + R) d\gamma \\ &\leq \int_{\mathbb{R}^{2d} \setminus \mathcal{C} \times \mathcal{C}} (\|x\| + R) d\gamma \\ &= \int_{\mathbb{R}^{2d} \setminus \mathcal{C}} (\|x\| + R) dp^* \\ &\leq \int_{\mathbb{R}^{2d} \setminus \mathcal{C}} 2\|x\| dp^* = \frac{2}{\sqrt{2\pi}} \int_{\mathbb{R}^{2d} \setminus \mathcal{C}} \|x\| e^{-\frac{\|x\|^2}{2}} dx \end{aligned}$$

Now, note that  $\int_{\mathbb{R}^{2d}} \|x\| e^{-\frac{\|x\|^2}{2}} dx < \infty$ . Hence, by the Dominated Convergence Theorem,

$$\lim_{R \rightarrow \infty} \int_{\mathbb{R}^{2d} \setminus B(0,R)} \|x\| e^{-\frac{\|x\|^2}{2}} dx = 0.$$

Thus, given any  $\delta > 0$ , we can choose  $R$  large enough so that the integral above is smaller than  $\delta$ , which concludes the proof.  $\square$

#### D.4 Derivatives of flow maps

We state and prove a technical lemma about the ODE that the derivative of a flow map satisfies.

**Lemma 12.** *Suppose  $x_t = x(t)$  satisfies the ODE*

$$\dot{x} = F(x, t)$$

*with flow map  $T(x, t) : \mathbb{R}^n \times \mathbb{R} \rightarrow \mathbb{R}^n$ . Suppose  $\alpha(t)$  be the derivative of the map  $x \mapsto T(x, t)$  at  $x_0$ , then  $\alpha(t)$  satisfies*

$$\dot{\alpha} = DF(x_t, t)\alpha$$

*with  $\alpha(0) = \mathbf{I}$ .*

*Proof.* Let  $T_t(x) = T(x, t)$ . Then  $T_t$  satisfies

$$T_t(x_0) = \int_0^t F(x_s, s) ds.$$

Differentiating, we get

$$\begin{aligned} \alpha(t) = DT_t(x_0) &= \int_0^t D(F(x_s, s)) ds \\ &= \int_0^t DF(x_s, s) DT_s(x_0) ds && \text{by chain rule} \\ &= \int_0^t DF(x_s, s) \alpha(s) ds. \end{aligned}$$

Now, looking at the derivative with respect to  $t$ , we get

$$\dot{\alpha} = DF(x_t, t)\alpha,$$

which is the required result.  $\square$

#### D.5 Solving Perturbed ODEs

In this section, we state a result about finding approximate solutions of perturbed differential equations. Consider the ODE having the following general form:

$$\dot{x} = Ax + \epsilon g(x, t)$$

The reason we are concerned with this ODE is that the ODE given by Equation (12) has precisely this form, namely with  $x \equiv \begin{bmatrix} x \\ v \end{bmatrix}$ ,  $A \equiv \begin{bmatrix} 0 & \mathbf{I}_d \\ -\text{diag}(\Omega^2) & 0 \end{bmatrix}$  and  $\epsilon g(x, t) \equiv -\tau \begin{bmatrix} F(v, t) \odot x \\ J(x, t) + G(x, t) \odot v \end{bmatrix}$ .

Let  $T^x : \mathbb{R} \times \mathbb{R}^n \rightarrow \mathbb{R}^n$  be the time  $t$  flow map for this ODE. We will find a flow map  $T^y : \mathbb{R} \times \mathbb{R}^n \rightarrow \mathbb{R}^n$  such that the maps  $T_t^x$  defined by  $T_t^x(x) = T^x(t, x)$  and the map  $T_t^y$  defined by  $T_t^y(y) = T^y(t, y)$  are uniformly  $\epsilon$ -close over  $\mathcal{C}$  in  $C^r$  topology for all  $0 \leq t \leq 2\pi$ . That is,

$$\sup_x \|T_t^x(x) - T_t^y(x)\| + \|DT_t^x(x) - DT_t^y(x)\| + \dots + \|D^r T_t^x(x) - D^r T_t^y(x)\|$$

is small, for all  $t \in [0, 2\pi]$ . Here  $D^r$  denotes the  $r$ -th derivative, and the norms are defined inductively as follows: for a  $r$ -tensor  $\mathcal{T}$ , we let  $\|\mathcal{T}\| = \sup_{\|u\|=1} \|\mathcal{T}u\|$ ; here  $\mathcal{T}u$  is a  $(r-1)$ -tensor. (The choice of norm is not important; we choose this for convenience.)



**Lemma 13.** *Consider the ODE*

$$\frac{d}{dt}x(t) = F(x(t), t) + \epsilon G(x(t), t) \quad (51)$$

where  $x : [0, t_{\max}] \rightarrow \mathbb{R}^n$ ,  $F, G : \mathbb{R}^n \times \mathbb{R} \rightarrow \mathbb{R}^n$ , and  $F(x, t), G(x, t)$  are  $C^1$ , and  $F$  is  $L$ -Lipschitz. Let  $\mathcal{C}$  be a compact set, and suppose that for all  $x_0 \in \mathcal{C}$ , solutions to (51) with  $x(0) = x_0$  exist for  $0 \leq t \leq t_{\max}$  and  $\epsilon = 0$ . Then there exists  $\epsilon_0$  such that solutions to (51) with  $x(0) = x_0$  exist for  $0 \leq t \leq t_{\max}$  and  $0 \leq \epsilon < \epsilon_0$ .

Moreover, letting  $x^{(\epsilon)}(t)$  be the solution with given  $\epsilon$ , we have that as  $\epsilon \rightarrow 0$ ,  $\|x^{(\epsilon)}(t) - x^{(0)}(t)\| = O(\epsilon)$ , where the constants in the  $O(\cdot)$  depend only on  $L$  and  $\max_{0 \leq t \leq t_{\max}, x_0 \in \mathcal{C}} \|G(x^{(0)}(t), t)\|$  (the maximum of  $G$  on the  $\epsilon = 0$  trajectories).

*Proof.* Let  $T^\epsilon(t, x_0)$  be the flow map of (51). Let  $\mathcal{K} = T^0(\mathcal{C} \times [0, t_{\max}])$  be the image of  $\mathcal{C} \times [0, t_{\max}]$  under the flow map  $T^0$ . Since  $F$  is  $C^1$ ,  $T^0$  is  $C^1$ , which implies that  $\mathcal{K}$  is bounded. Fix some  $\epsilon_2 > 0$ . Let  $B(\mathcal{K}, r)$  denote the set

$$B(\mathcal{K}, r) = \{(x, t) \in \mathbb{R}^n \times [0, t_{\max}] : d(\mathcal{K}, x) \leq r\}$$

Let  $\mathcal{K}_2 = B(\mathcal{K}, \epsilon_2)$ . Note that since  $\mathcal{K}$  is compact, so is  $\mathcal{K}_2$ . Let

$$M = \max \left\{ \sup_{(x,t) \in \mathcal{K}_2 \times [0, t_{\max}]} \|F(x, t)\|, \sup_{(x,t) \in \mathcal{K}_2 \times [0, t_{\max}]} \|G(x, t)\| \right\}$$

$M$  is finite since  $\mathcal{K}_2$  is compact and  $F, G$  are  $C^1$ .

Let  $h : \mathbb{R} \rightarrow \mathbb{R}$  be a 1-Lipschitz  $C^1$  function such that

$$\begin{aligned} h(x) &= x \text{ if } |x| \leq M \\ |h(x)| &\leq 2M \text{ for all } x. \end{aligned}$$

Let  $h_n : \mathbb{R}^n \rightarrow \mathbb{R}^n$  be defined as  $h_n(x) = \frac{x}{\|x\|} h(\|x\|)$ . Then  $h_n(x)$  is also  $C^1$  and is the identity function on  $B(0, M)$ . Let  $F_1 = h_n \circ F$  and let  $G_1 = h_n \circ G$ . Then  $F_1, G_1$  are  $C^1$  functions such that  $\|F_1\|, \|G_1\| \leq 2M$ . Further,  $F_1$  is  $L$ -Lipschitz. Now, we look at the ODE

$$\frac{d}{dt}x(t) = F_1(x(t), t) + \epsilon G_1(x(t), t) \quad (52)$$

Since  $F_1, G_1$  are  $C^1$ , note that the function  $H_1(x, \epsilon, t) = F_1(x, t) + \epsilon G_1(x, t)$  is  $C^1$  in  $x, t, \epsilon$ . Therefore, using the existence theorem for parametric ODEs (Theorem 1.2, [Chicone \[2006\]](#)), there is a  $\epsilon_1, t_1 > 0$  such that solutions  $x_1^{(\epsilon)}(t)$  to (52) exist for all  $x_0 \in \mathcal{C}, \epsilon < \epsilon_1$  and  $t < t_1$ . Further, the extensibility result for the ODEs (Theorem 1.4, [Chicone \[2006\]](#)) states that if  $t_1$  is largest such value for which such solutions exist, then there exists a  $x_0 \in \mathcal{C}$  and  $\epsilon < \epsilon_1$  such that  $\lim_{t \rightarrow t_1} \|x_1^{(\epsilon)}(t)\| = \infty$ .

Now, we will bound  $\|x_1^{(\epsilon)} - x_1^{(0)}\|$  for  $t < t_1$ . Define  $\alpha = x_1^{(0)} - x_1^{(\epsilon)}$ . Then  $\alpha(t)$  satisfies

$$\frac{d}{dt}\alpha(t) = F_1(x_1^{(0)}(t), t) - F_1(x_1^{(\epsilon)}(t), t) - \epsilon G_1(x_1^{(\epsilon)}(t), t)$$

Therefore,

$$\begin{aligned} \frac{d}{dt}\|\alpha(t)\|^2 &\leq 2\|\alpha(t)\| \left\| \frac{d}{dt}\alpha(t) \right\| \\ &\leq 2\|\alpha(t)\| \|F_1(x_1^{(0)}(t), t) - F_1(x_1^{(\epsilon)}(t), t) - \epsilon G_1(x_1^{(\epsilon)}(t), t)\| \\ &\leq 2\|\alpha(t)\| (L\|\alpha(t)\| + 2\epsilon M) \\ &\leq 2L\|\alpha(t)\|^2 + 4\epsilon M\|\alpha(t)\| \\ \implies \frac{d}{dt}\|\alpha(t)\| &\leq \frac{1}{2}\|\alpha(t)\|^{-1} \frac{d}{dt}\|\alpha(t)\|^2 \leq L\|\alpha(t)\| + 2\epsilon M \end{aligned}$$

Now, Grönwall's inequality (Lemma 15) gives us the bound

$$\|\alpha(t)\| \leq 2\epsilon t M e^{Lt} \leq 2\epsilon t_{\max} M e^{Lt_{\max}} = O(\epsilon) \quad (53)$$

Since  $t_{\max}, L, M$  are fixed, we can choose  $\epsilon_0$  such that  $\epsilon_0 < \epsilon_1$  and  $2\epsilon_0 t_{\max} M e^{L t_{\max}} < \epsilon_2$ , which ensure that for all  $x_0 \in \mathcal{C}, \epsilon < \epsilon_0$  and  $t < \min(t_1, t_{\max})$ , the point  $x_1^{(\epsilon)}(t)$  is in the interior of  $\mathcal{K}_2$ . Therefore, if  $t_1 \leq t_{\max}$  then  $\lim_{t \rightarrow t_1} \|x_1^{(\epsilon)}(t)\| \in \mathcal{K}_2$ , which contradicts the extensibility result. Thus,  $t_1 > t_{\max}$ , and hence flow maps for (52) exists for all  $0 \leq \epsilon \leq \epsilon_0$  and  $0 \leq t \leq t_{\max}$ .

Now, we end with the remark that since  $F_1 = F$  and  $G_1 = G$  in  $\mathcal{K}_2$ , the flow map of (52) is a flow map for (51) inside  $\mathcal{K}_2$ , and therefore, solutions to (51) exist for all  $x_0 \in \mathcal{C}, 0 \leq \epsilon \leq \epsilon_0$  and  $0 \leq t \leq t_{\max}$ .

Lastly, we will comment on value of  $M$ . Let  $G$  be  $L_1$ -Lipschitz on  $\mathcal{K}_2$ , and let

$$M' = \max_{0 \leq t \leq t_{\max}, x_0 \in \mathcal{C}} \|G(x^{(0)}(t), t)\|$$

Then  $M \leq M' + \epsilon_0 L_1$ . Therefore, we can just choose  $\epsilon_0$  small enough so that  $M \leq 2M' + 1$ , which enforces the constants in  $O(\cdot)$  notation to depend only on  $L, M'$  and  $t_{\max}$ . □

**Lemma 14.** *Consider the ODE's*

$$\begin{aligned} \frac{d}{dt}x(t) &= F(x(t), t) + \epsilon G(x(t), t) \\ \frac{d}{dt}y_0(t) &= F(y_0(t), t) \\ \frac{d}{dt}y(t) &= F(y(t), t) + \epsilon G(y_0(t), t) \end{aligned} \quad (54)$$

such  $F, G : \mathbb{R}^n \times \mathbb{R} \rightarrow \mathbb{R}^n$  are in  $C^{r+1}$ . Let  $\mathcal{C} \subseteq \mathbb{R}^n$  be a compact set, and suppose that solutions to (54) exist for all  $x_0 \in \mathcal{C}$ . Let  $T^x(x_0), T^{y_0}(x_0)$ , and  $T^y(x_0)$  be the time  $t_{\max}$ -flow map corresponding to this ODE for initial values  $x(t) = y_0(t) = y(t) = x_0$ .

Then as  $\epsilon \rightarrow 0$ , the maps  $T_t^x$  and  $T_t^y$  are  $O(\epsilon^2)$  uniformly close over  $\mathcal{C}$  in  $C^r$  topology, for all  $t \in [0, t_{\max}]$ . The constants in the  $O(\cdot)$  depend on  $\max_{0 \leq k \leq r+1, x_0 \in \mathcal{C}, 0 \leq t \leq t_{\max}} \|D^k F(x, t)|_{x=y_0(t)}\|$  (the first  $r+1$  derivatives of  $F$  on the  $y_0$ -trajectories) and  $\max_{0 \leq k \leq r, x_0 \in \mathcal{C}, 0 \leq t \leq t_{\max}} \|D^k G(x, t)|_{x=y_0(t)}\|$ , (the first  $r$  derivatives of  $G$  on the  $y_0$ -trajectories).

*Proof.* Let  $F_\epsilon(x, t) = F(x, t) + \epsilon G(x, t)$ , and let  $T_t^\epsilon(x_0)$  denote the flow map of (54) starting at  $x_0$ . From (43), there is a polynomial  $P = P_{i_1, \dots, i_r}$  such that

$$\frac{d}{dt} \partial_{i_1 \dots i_r} T_t^x(x_0) = \sum_{i=1}^d \partial_i F_\epsilon(x(t), t) \partial_{i_1 \dots i_r} T_{t,i}^\epsilon + P(DF_\epsilon, \dots, D^r F_\epsilon, DT_t^x, \dots, D^{r-1} T_t^x) \quad (55)$$

On the other hand, applying (43) to  $y_0$  gives

$$\frac{d}{dt} \partial_{i_1 \dots i_r} T_t^{y_0}(x_0) = \sum_{i=1}^d \partial_i F(y_0(t), t) \partial_{i_1 \dots i_r} T_{t,i}^{y_0} + P(DF, \dots, D^r F, DT_t^{y_0}, \dots, D^{r-1} T_t^{y_0})$$

We will now show that these two trajectories are  $O(\epsilon)$  uniformly close by induction on  $r$ . Note that the base case ( $r = 0$ ) is proved in Lemma 13. We will first show that

$$\|P(DF_\epsilon, \dots, D^r F_\epsilon, DT_t^x, \dots, D^{r-1} T_t^x) - P(DF, \dots, D^r F, DT_t^{y_0}, \dots, D^{r-1} T_t^{y_0})\| = O(\epsilon)$$

Since  $P$  is a fixed polynomial that depends on  $i_1, \dots, i_r$ , to show the above, we only need to show that the coordinates are  $O(\epsilon)$  close, for small enough  $\epsilon$ .

$$\begin{aligned} \|D^k F_\epsilon(x(t), t) - D^k F(y_0(t), t)\| &\leq \|D^k F_\epsilon(x(t), t) - D^k F(x(t), t)\| + \|D^k F(x(t), t) - D^k F(y_0(t), t)\| \\ &\leq \epsilon \|D^k G(x(t), t)\| + \|x(t) - y_0(t)\| (2N_{k+1} + 1) \\ &\leq O(\epsilon(2M_k + 2N_{k+1} + 2)) \end{aligned}$$

where  $N_{k+1} = \sup_{x_0 \in \mathcal{C}, 0 \leq t \leq t_{\max}} \|D^{k+1} F(x, t)|_{x=y_0(t)}\|$  and  $M_k = \sup_{x_0 \in \mathcal{C}, 0 \leq t \leq t_{\max}} \|D^k G(x, t)|_{x=y_0(t)}\|$ . The second inequality follows since the base case

(Lemma 13) implies that  $\|x(t) - y_0(t)\| = O(\epsilon)$ , and since  $D^{k+1}F$  is continuous, it follows that for small enough  $\epsilon$ ,  $\|D^{k+1}F|_{(x,t)}\| \leq 2N_{k+1} + 1$ , for all  $x$  such that  $\|x - y_0(t)\| = O(\epsilon)$ . Similarly, note that for small enough  $\epsilon$ ,  $\|D^k G(x(t), t)\| \leq 2M_k + 1$ , since  $G$  is  $C^k$ . Therefore,  $\|D^k F_\epsilon(x(t), t) - D^k F(y_0(t), t)\| = O(\epsilon)$ , where constants in  $O(\cdot)$  depend  $M_k$  and  $N_{k+1}$ .

To simplify notation, let  $\alpha(t) = \frac{d}{dt} \partial_{i_1 \dots i_r} (T_t^x - T_t^{y_0})$ . Then,

$$\begin{aligned}
\frac{d}{dt} \alpha(t) &= \frac{d}{dt} \partial_{i_1 \dots i_r} (T_t^x - T_t^{y_0}) \\
&= \sum_{i=1}^d \partial_i F_\epsilon(x(t), t) \partial_{i_1 \dots i_r} T_{t,i}^x - \sum_{i=1}^d \partial_i F(y_0(t), t) \partial_{i_1 \dots i_r} T_{t,i}^{y_0} + O(\epsilon) \\
&= \sum_{i=1}^d \partial_i F_\epsilon(x(t), t) \partial_{i_1 \dots i_r} (T_{t,i}^x - T_{t,i}^{y_0}) + \sum_{i=1}^d (\partial_i F_\epsilon(x(t), t) - \partial_i F(y_0(t), t)) \partial_{i_1 \dots i_r} T_{t,i}^{y_0} + O(\epsilon) \\
&= DF_\epsilon(x(t), t) \partial_{i_1 \dots i_r} (T_t^x - T_t^{y_0}) + (DF_\epsilon(x(t), t) - DF(y_0(t), t)) \partial_{i_1 \dots i_r} T_t^x + O(\epsilon) \\
&= DF_\epsilon(x(t), t) \alpha(t) + (DF(x(t), t) - DF(y_0(t), t) + \epsilon G(x(t), t)) \partial_{i_1 \dots i_r} T_t^{y_0} + O(\epsilon) \\
\Rightarrow \frac{1}{2} \frac{d}{dt} \|\alpha\|^2 &\leq \|DF_\epsilon(x(t), t)\| \|\alpha\|^2 + O(\epsilon(N_2 + M_0)) \|\partial_{i_1 \dots i_r} T_t^{y_0}\| + O(\epsilon) \\
\Rightarrow \frac{d}{dt} \|\alpha\| &\leq \|DF(x(t), t)\| \|\alpha\| + O(\epsilon) \\
&\leq (2N_1 + 1) \|\alpha\| + O(\epsilon)
\end{aligned}$$

Now, Grönwall's inequality (Lemma 15) gives us the bound,

$$\|\alpha(t)\| \leq t_{\max} e^{N_1 t_{\max}} O(\epsilon) = O(\epsilon)$$

The constants in the last  $O(\cdot)$  notation depend on  $t_{\max}$ ,  $N_k$  for  $0 \leq k \leq r+1$  and  $M_k$  for  $0 \leq k \leq r$ .

This tells us that

$$\|T_t^x - T_t^{y_0}\|_{C^r} = O(\epsilon) \quad (56)$$

Now, note that  $T_t^y$  satisfies

$$\begin{aligned}
\frac{d}{dt} y(t) &= F(y(t), t) + \epsilon G(y(t), t) + \epsilon(G(y_0(t), t) - G(y(t), t)) \\
\implies \frac{d}{dt} y(t) &= F(y(t), t) + \epsilon G(y(t), t) + \epsilon^2 H(y(t), t)
\end{aligned}$$

where  $H(y, t) = \frac{1}{\epsilon}(G(y_0(t), t) - G(y(t), t))$ . Consider the system of ODEs

$$\frac{d}{dt} y(t) = F_\epsilon(y(t), t) + \gamma H(y(t), t) \quad (57)$$

Note that when  $\gamma = 0$ ,  $T_t^x$  is the flow map for this system, and when  $\gamma = \epsilon^2$ ,  $T_t^y$  is the flow map for this system. Therefore, applying (56) for the system (57), we get

$$\|T_t^x - T_t^y\|_{C^r} = O(\gamma) = O(\epsilon^2)$$

where the constants in  $O(\cdot)$  notation depend on  $\sup_{0 \leq k \leq r, x_0 \in \mathcal{C}, 0 \leq t \leq t_{\max}} \|D^{k+1} F_\epsilon(x(t), t)\|$  which is bounded by  $\max_{0 \leq k \leq r} (2N_{k+1} + 1)$  for small  $\epsilon$ , and  $M'_k = \sup_{0 \leq k \leq r, x_0 \in \mathcal{C}, 0 \leq t \leq t_{\max}} \|D^{k+1} H(x(t), t)\|$ . Using the definition of  $H$ ,

$$\begin{aligned}
\|D^k H(x(t), t)\| &= \frac{1}{\epsilon} \|D^k G(y_0(t), t) - D^k G(x(t), t)\| \\
&\leq \frac{1}{\epsilon} \|y_0(t) - x(t)\| (2M_{k+1} + 1) \\
&= \frac{1}{\epsilon} \cdot O(\epsilon) \cdot (2M_{k+1} + 1) = O(1)
\end{aligned}$$

where the constant in the  $O(\cdot)$  depends on  $M_0, \dots, M_{r+1}$  and  $N_1, \dots, N_{r+1}$ . This proves the dependence in  $O(\cdot)$  notation as stated in the statement, completing the proof.  $\square$

**Corollary 1.** Consider the ODE

$$\dot{x} = Ax + \epsilon g(x, t)$$

such that  $\|A\| = 1$  and  $g$  has bounded  $(r + 1)^{th}$  derivatives on a compact set  $\mathcal{C}$ . Let  $T^x$  be the flow map corresponding to this ODE. For fixed  $x_0$ , let  $y_0, y_1$  be functions satisfying

$$\begin{aligned} \dot{y}_0 &= Ay_0 \\ \dot{y}_1 &= Ay_1 + g(y_0(t), t) \end{aligned}$$

such that  $y_0(0) = x_0$  and  $y_1(0) = 0$ . Consider the flow map  $T^y : \mathbb{R} \times \mathbb{R}^n$  such that  $T^y(t, x_0) = y_0(t) + \epsilon y_1(t)$ . Then, the maps  $T_t^x$  and  $T_t^y$  are  $O(\epsilon^2)$  uniformly close over  $\mathcal{C}$  in  $C^r$  topology, for all  $t \in [0, 2\pi]$ . The constants in the  $O(\cdot)$  depend on  $\|A\|$  and the first  $r$  derivatives of  $g$  on the trajectories  $x(t) = e^{At}x_0, x_0 \in \mathcal{C}$ .

This follows directly from Lemma 14, after noting  $\dot{y} = Ay_0 + \epsilon Ay_1 + \epsilon g(y_0(t), t) = Ay + \epsilon g(y_0(t), t)$ . Note that  $F(x) = Ax$  is a linear function, so derivatives of  $F$  are bounded, and the  $y_0$  trajectories can be computed easily.

## D.6 Grönwall lemma

The following lemma is very useful for bounding the growth of solutions, or errors from perturbations to ODE's.

**Lemma 15** (Grönwall). *If  $x(t)$  is differentiable on  $t \in [0, t_{\max}]$  and satisfies the differential inequality*

$$\frac{d}{dt}x(t) \leq ax(t) + b,$$

then

$$x(t) \leq (bt + x(0))e^{at}$$

for all  $t \in [0, t_{\max}]$ .
